# Supplementary material for: Endogenous Small-Noncoding RNAs and Potential Functions in Desiccation Tolerance in Physcomitrella Patens
Source: PubMed Central journal article supplement (PMC4957126; doi:10.1038/srep30118), 2016-07-22
Supplement: srep30118-s1.pdf [file srep30118-s1.pdf]

**Endogenous small-noncoding RNAs and potential functions in desiccation responses in *Physcomitrella patens***

Jing Xia<sup>1,2</sup>, Xiaoqin Wang<sup>3,4,5</sup>, Pierre-Francois Perroud<sup>4</sup>, Yikun He<sup>3</sup>, Ralph Quatrano<sup>4</sup> and Weixiong Zhang<sup>2,6,1†</sup>

- <sup>1</sup> Institute for Systems Biology, Jiangnan University, Wuhan, Hubei 430056, China;
- <sup>2</sup> Department of Computer Science and Engineering, <sup>4</sup> Department of Biology, and <sup>6</sup> Department of Genetics, Washington University, St. Louis, MO 63130, USA;
- <sup>3</sup> College of Life Sciences, Capital Normal University, Beijing 100048, China.
- <sup>5</sup> Key Laboratory of Urban Agriculture (North) of Ministry of Agriculture, Beijing University of Agriculture, Beijing 102206, China

† Correspondence – WZ: weixiong.zhang@wustl.edu.

**Supplemental Figure S1.** Base pairings between a novel-miR (query) and a MYB gene (target) are shown in the format as in Figure S1. Reads from a degradome profiling aligned to the miRNA cleavage site were highlighted in red.

| miRNA ID(query) | target                                                                                   | score | range     | gene_annotation          |
|-----------------|------------------------------------------------------------------------------------------|-------|-----------|--------------------------|
| novel_miR21     | Ppls173_12V6.1                                                                           | 6     | 2102-2123 | SER/ARG-rich protein 34A |
| query           | 3' GGUCCAU-GUCACUGAAGCUCA 5'                                                             |       |           |                          |
|                 | .. ::: :.....                                                                            |       |           |                          |
| target          | 5' ATGTGTAGCAGTGATTCGGGTAGAGTTTCAGCATTGGAATGTTCTTGCGTGGTCATATACCCAAATGTGCAACAAGGATTCT 3' |       |           |                          |
|                 | GTAGCAGTGATTCGGGTAGAGTT_2                                                                |       |           |                          |
|                 | <b>TGATTCGGGTAGAGTTTCAGCAT_61</b>                                                        |       |           |                          |
|                 | AGAGTTTCAGCATTGGAATGTTCT_10                                                              |       |           |                          |
|                 | GTTTCAGCATTGGAATGTTCTTGC_1                                                               |       |           |                          |
|                 | CAGCATTGGAATGTTCTTGCGTGG_4                                                               |       |           |                          |
|                 | AGCATTGGAATGTTCTTGCGTGGT_2                                                               |       |           |                          |
|                 | CATTGGAATGTTCTTGCGTGGTCA_3                                                               |       |           |                          |
|                 | TGAATGTTCTTGCGTGGTCATATA_2                                                               |       |           |                          |
|                 | ATGTTCTTGCGTGGTCATATACCC_2                                                               |       |           |                          |
|                 | TCTTGCGTGGTCATATACCCAAAT_1                                                               |       |           |                          |
|                 | CTTGCGTGGTCATATACCCAAATG_2                                                               |       |           |                          |



**Supplemental Figure S3.** A long hairpin structure, **hpRNA-2**, gives rise to siRNA species. The bottom of the diagram displays the read distributions across the genomic loci of the novel hairpin.

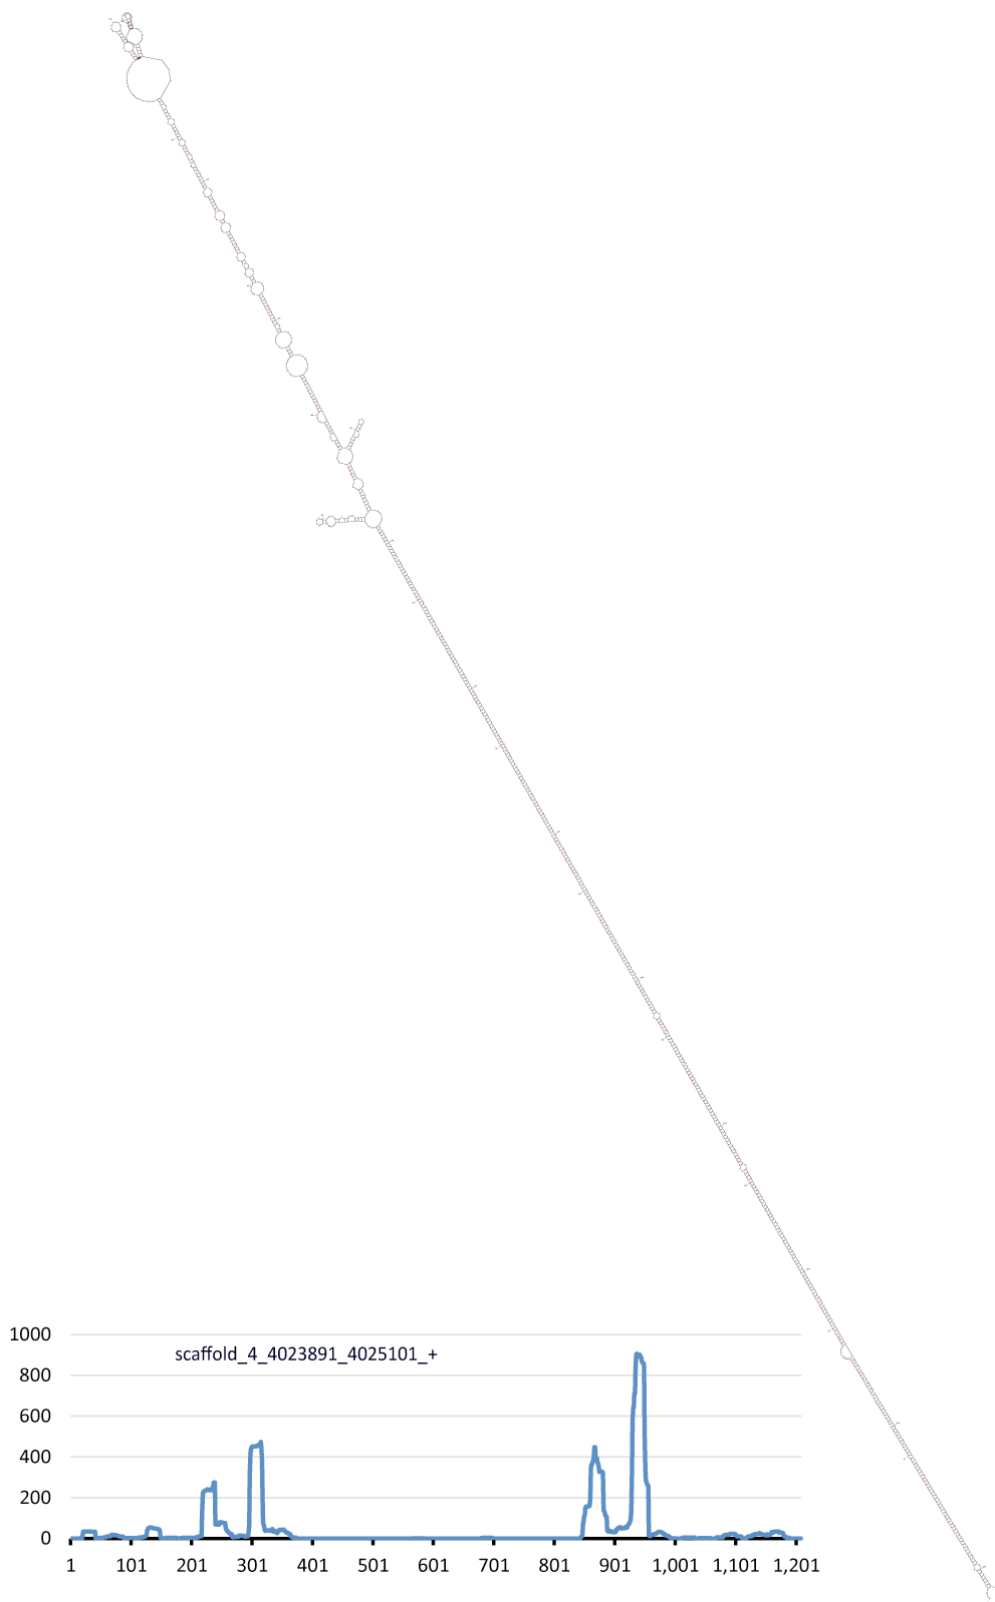

**Supplemental Figure S4.** Base pairings between the siRNA species from hpRNA-2 (query) and gene Pp1s76\_75V6.1 (target) are shown in the format as in Figure S1. Reads from a degradome profiling aligned to the miRNA cleavage site were highlighted in red.

| siRNA ID(query)                         | target        | score | range   | gene_annotation              |
|-----------------------------------------|---------------|-------|---------|------------------------------|
| hpRNA-2 scaffold_4_4023891_4025101+_136 | Pp1s76_75V6.1 | 5     | 209-228 | Ribosomal S17 family protein |

  

```

query 3' CGUCUAGGAAGGUGCUUACUC 5'
      ::: ::: ::::.. .: :::
target 5' GCAATCATCCATCGAAGAGGCTTCGCAATAAGATCGCAGGATTTGCCACTCATTGTGATGAAGCGTATCCAGAGGGGACCACTGCGTGGA 3'
      CAATCATCCATCGAAGAGGCTTC_1
      TTCCATCGAAGAGGCTTCGCAATA_3
      TCCATCGAAGAGGCTTCGCAATAA_1
      ATCGAAGAGGCTTCGCAATAAGAT_126
      GAAGAGGCTTCGCAATAAGATCGC_1
      AAGAGGCTTCGCAATAAGATCGCA_1
      AGGCTTCGCAATAAGATCGCAGGA_1
      AATAAGATCGCAGGATTTGCCACT_3
      ATAAGATCGCAGGATTTGCCACTC_2
      TAAGATCGCAGGATTTGCCACTCA_3
      AAGATCGCAGGATTTGCCACTCAT_5
      AGATCGCAGGATTTGCCACTCATT_2
      GATCGCAGGATTTGCCACTCATT_2
      ATCGCAGGATTTGCCACTCATTG_8
      GCAGGATTTGCCACTCATTGTG_3
      CAGGATTTGCCACTCATTGTG_5
      AGGATTTGCCACTCATTGTG_2
      TTTGCCACTCATTGTGATGAAGCGT_2
      TTGCCACTCATTGTGATGAAGCGT_1
      TGCCACTCATTGTGATGAAGCGTAT_1
      CACTCATTGTGATGAAGCGTATCCA_2
      CTCATTGTGATGAAGCGTATCCAGA_1
      TCATTGTGATGAAGCGTATCCAGAG_6
      CATTGTGATGAAGCGTATCCAGAGG_1
      ATTTGATGAAGCGTATCCAGAGGG_1
      TTTGATGAAGCGTATCCAGAGGGG_3
      TTGATGAAGCGTATCCAGAGGGGA_4
      TGATGAAGCGTATCCAGAGGGGAC_3
      GATGAAGCGTATCCAGAGGGGACC_1
      ATGAAGCGTATCCAGAGGGGACCA_6
      TGAAGCGTATCCAGAGGGGACAG_1
      AAGCGTATCCAGAGGGGACCACTG_1
  
```

**Supplemental Table S1.** Statistics of raw sequence reads from eight small-RNA libraries from normal (**WT**) and mutant (**ABI3**) *P. patens* under four conditions.

| sampleID | condition                                              | raw        | qualified  | mapped<br>(genome &<br>cDNA) | mapped<br>(miRNA) | miRNA % |
|----------|--------------------------------------------------------|------------|------------|------------------------------|-------------------|---------|
| sample 1 | WT 7d                                                  | 22,023,071 | 11,805,438 | 6,492,651                    | 354614            | 5.5%    |
| sample 2 | WT ABA treatment 24h                                   | 23,888,512 | 15,487,870 | 9,631,114                    | 228469            | 2.4%    |
| sample 3 | WT after ABA treatment 24h and<br>then dehydrate 24h   | 22,582,754 | 13,606,137 | 9,355,373                    | 178119            | 1.9%    |
| sample 4 | WT after dehydrate 24h and then<br>rehydrate 30min     | 28,620,792 | 11,210,278 | 6,878,694                    | 156251            | 2.3%    |
| sample 5 | ABI3 7d                                                | 20,941,360 | 18,563,669 | 12,722,857                   | 860992            | 6.8%    |
| sample 6 | ABI3 ABA treatment 24h                                 | 23,228,605 | 13,710,072 | 8,459,668                    | 382485            | 4.5%    |
| sample 7 | ABI3 after ABA treatment 24h and<br>then dehydrate 24h | 22,602,785 | 14,770,464 | 9,916,971                    | 262228            | 2.6%    |
| sample 8 | ABI3 after dehydrate 24h and then<br>rehydrate 30min   | 26,835,253 | 9,113,175  | 6,440,788                    | 243738            | 3.8%    |

**Supplemental Table S2.** List of novels miRNAs identified in the current study. Included in the table are miRNA temporary ID, the genomic scaffold ID, the start and end positions, strand (strd.), mature miRNA sequences and the number of qualified reads from all small RNA libraries (#. reads).

| temp ID     | scaffold ID  | start   | end     | strd. | miRNA on 5p arm          | #. Reads | miRNA on 3p arm          | #. Reads |
|-------------|--------------|---------|---------|-------|--------------------------|----------|--------------------------|----------|
| novel_miR1  | scaffold_137 | 475811  | 475970  | +     | CCATGGCTCTGGTGGTTCTTC    | 4        | AGAACCACCAGAGCCATGGGG    | 30       |
| novel_miR2  | scaffold_143 | 180165  | 180324  | +     | CCCTGGATCAATGCATTGGAA    | 23       | CCAATGCATTGATCCAGGGTG    | 40       |
| novel_miR3  | scaffold_15  | 2756714 | 2756873 | +     | CTCATGAGTGATGGTATGTGC    | 78       | ACATATCATCACTCAAGAGAG    | 1        |
| novel_miR4  | scaffold_165 | 688983  | 689142  | +     | CCTTTTGATGCATTAATGA      | 1        | CATTTAATGCATCAAAAGGAC    | 12       |
| novel_miR5  | scaffold_20  | 103704  | 103863  | +     | TAGAAAGTAATCCGTAGCGAAG   | 12       | TCGCTACAGATCACTTCTATA    | 3        |
| novel_miR6  | scaffold_34  | 800366  | 800525  | +     | TGAAAGCACCCAGAAAATGAT    | 5        | CATTTTCTGGGTGCTTTCATC    | 2        |
| novel_miR7  | scaffold_5   | 3307718 | 3307877 | +     | TGTGATGATAGAAGTTGGAATATA | 22       | TATTCCAAATTTTATCATCACAAT | 1        |
| novel_miR8  | scaffold_150 | 632159  | 632318  | +     | AAGTTGATTGATTTGGCACA     | 4        | TGCCAAAATCAATCAACTCGAC   | 8        |
| novel_miR9  | scaffold_77  | 1413128 | 1413287 | +     | TCGCCGACTAGAATTTTATCT    | 8        | ATAAAATTCTAGTCGGCGAAG    | 5        |
| novel_miR10 | scaffold_150 | 594035  | 594194  | -     | TCTTTCTCACACACTGACA      | 11       | TCAGTGTGTGGGTGTGAGAGC    | 15       |
| novel_miR11 | scaffold_83  | 1586908 | 1587067 | -     | TGGATAAGCGCTCAAGAAACAC   | 61       | TTTCTGAAGCGTTTTTCCATC    | 83       |
| novel_miR12 | scaffold_81  | 496623  | 496872  | +     | ACTTGCTGCTATTTGTGGATG    | 41       | TCCACAAATAGCAGCAAGTGC    | 3269     |
| novel_miR13 | scaffold_99  | 649008  | 649257  | +     | ACAATCTATCACAGTACTTAG    | 1178     | AAGTACTGTGATAGATTGTTG    | 233      |
| novel_miR14 | scaffold_104 | 412737  | 412886  | +     | AGCCATATGTGTAATCTGTG     | 88       | CAGATTTACACATATGGCTGG    | 524      |
| novel_miR15 | scaffold_79  | 576842  | 576991  | -     | TAAACAATCACAGATCACATT    | 23       | TGTGATCTGTGATTGTTTAAA    | 115      |
| novel_miR16 | scaffold_45  | 1376161 | 1376310 | -     | TGTGGTTGGAATTGTTAGAGC    | 146      | TCTAATAATCCAACACTACAGG   | 1        |
| novel_miR17 | scaffold_46  | 1285893 | 1286042 | -     | TCGGATCGGATTTATGCTTGT    | 155      | ACAAGCACTAATCCGATCCGAC   | 1        |
| novel_miR18 | scaffold_83  | 1142106 | 1142255 | -     | TTACCCCAGTCAAATATTCC     | 8        | TATAGATTGACTGGGGTAACT    | 725      |
| novel_miR19 | scaffold_375 | 169687  | 169786  | +     | ATGGATTGCCTAAGAGAGACG    | 401      | TCTCTCTTAGCCAATCATGC     | 2        |
| novel_miR20 | scaffold_309 | 301356  | 301605  | +     | CATCTCACTACCATATCCATT    | 4        | TGGACATGGTAGTGAGAAGCT    | 334      |
| novel_miR21 | scaffold_66  | 898001  | 898160  | +     | AGGTACAGAGGCTTCGAGTGG    | 1        | ACTCGAAGTCACTGTACCTGG    | 26       |
| novel_miR22 | scaffold_170 | 61513   | 61655   | -     | TCAAAGATCTCCGTCTGCCCT    | 1134     | GCAGGTGGCGATCTTTGAAGC    | 2208     |

**Supplemental Table S3.** List of known miRNAs in *P. patens*. miRNA ID: numbers after miRNA names indicate the number of individual members producing the same mature miRNA. Included in the table are the number of normalized reads for each condition.

**WT**

**ABI3 mutant**

| miRNA ID     | 7 day    | ABA treatment 24h | dehydrate 24h | rehydrate 30min | 7 day    | ABA treatment 24h | dehydrate 24h | rehydrate 30min |
|--------------|----------|-------------------|---------------|-----------------|----------|-------------------|---------------|-----------------|
| ppt-MIR319d  | 80741.6  | 34018.8           | 38389.2       | 105130.0        | 96780.6  | 20151.2           | 20201.4       | 132643.7        |
| ppt-MIR535d  | 103970.0 | 31454.1           | 25767.1       | 34935.4         | 113304.2 | 62954.2           | 56132.9       | 90586.5         |
| ppt-MIR535a  | 99982.7  | 29750.4           | 25190.9       | 34244.4         | 110248.9 | 59506.6           | 53996.4       | 88006.3         |
| ppt-MIR535b  | 99463.2  | 29725.0           | 25177.8       | 34239.3         | 109363.0 | 59463.2           | 53983.2       | 87972.4         |
| ppt-MIR535c  | 99433.6  | 29723.2           | 25176.9       | 34238.0         | 109348.5 | 59434.3           | 53978.8       | 87972.4         |
| ppt-MIR319c  | 62968.7  | 31226.4           | 37037.8       | 104743.9        | 87711.5  | 18765.2           | 19103.6       | 132109.2        |
| ppt-MIR319e  | 62181.5  | 30917.1           | 36656.8       | 103976.7        | 86605.2  | 18326.3           | 18850.8       | 131375.3        |
| ppt-MIR1028b | 79931.5  | 20065.3           | 24614.7       | 8366.8          | 113619.4 | 48334.7           | 28798.6       | 14878.7         |
| ppt-MIR1028c | 13964.5  | 10722.1           | 7801.1        | 1535.7          | 71122.0  | 70331.5           | 30273.5       | 5191.5          |
| ppt-MIR904a  | 14478.6  | 46703.1           | 3144.5        | 5078.2          | 10825.7  | 80043.1           | 10023.6       | 3805.1          |
| ppt-MIR319a  | 30055.2  | 9628.0            | 8674.3        | 9012.0          | 47641.7  | 11220.5           | 10587.5       | 16100.9         |
| ppt-MIR904b  | 23797.6  | 24286.4           | 2010.8        | 2738.5          | 18113.4  | 48114.7           | 8828.0        | 3468.7          |
| ppt-MIR319b  | 26502.5  | 8876.0            | 7930.0        | 8525.5          | 42546.1  | 9781.8            | 9836.8        | 14870.5         |
| ppt-MIR156c  | 32480.2  | 8378.8            | 5887.5        | 2240.6          | 19478.6  | 13463.8           | 31764.2       | 9542.0          |
| ppt-MIR156a  | 32482.9  | 8392.4            | 5895.0        | 2243.2          | 19453.9  | 13422.5           | 31748.3       | 9537.9          |
| ppt-MIR534a  | 32055.0  | 11650.2           | 4849.9        | 2457.8          | 32039.1  | 17139.6           | 11032.4       | 6270.0          |
| ppt-MIR538c  | 20476.4  | 12287.0           | 4726.6        | 1493.7          | 21117.9  | 20505.5           | 10003.3       | 3425.3          |
| ppt-MIR538b  | 19542.5  | 11830.7           | 4474.5        | 1260.0          | 19929.8  | 19954.0           | 9465.0        | 2710.4          |
| ppt-MIR156b  | 21489.7  | 2993.7            | 3508.8        | 1340.1          | 13979.9  | 8681.8            | 16856.1       | 4568.9          |
| ppt-MIR536e  | 14871.5  | 3881.0            | 2583.3        | 3664.5          | 17651.9  | 9832.4            | 4550.6        | 7193.8          |
| ppt-MIR1023a | 10440.1  | 2595.5            | 1361.7        | 226.1           | 14577.4  | 15037.8           | 7304.7        | 1608.9          |
| ppt-MIR538a  | 9603.0   | 9201.6            | 3479.8        | 1260.0          | 9622.6   | 10366.4           | 6866.8        | 2551.7          |
| ppt-MIR1025  | 4280.7   | 6021.0            | 3240.7        | 5273.8          | 6907.2   | 10989.1           | 6242.2        | 9186.6          |
| ppt-MIR536d  | 10690.4  | 2567.4            | 1943.5        | 3580.7          | 12274.7  | 7264.8            | 3535.6        | 7271.1          |
| ppt-MIR536b  | 9784.7   | 2375.9            | 1716.6        | 3489.2          | 11204.8  | 6195.9            | 3099.5        | 7010.7          |
| ppt-MIR536a  | 9773.9   | 2373.2            | 1716.6        | 3484.1          | 11162.9  | 6176.2            | 3097.7        | 7002.5          |
| ppt-MIR1024a | 3747.8   | 1619.3            | 1708.2        | 5367.8          | 9948.8   | 2600.6            | 2518.9        | 16659.8         |
| ppt-MIR1024b | 3747.8   | 1618.4            | 1711.9        | 5352.6          | 9912.4   | 2599.6            | 2517.1        | 16606.9         |
| ppt-MIR894   | 5783.9   | 5269.0            | 2943.7        | 1126.7          | 6153.2   | 2438.5            | 2777.9        | 862.8           |
| ppt-MIR1218  | 4275.3   | 1458.8            | 937.7         | 2838.9          | 5907.3   | 3713.0            | 2012.3        | 4712.7          |

|              |        |        |        |        |        |        |        |        |
|--------------|--------|--------|--------|--------|--------|--------|--------|--------|
| ppt-MIR1215  | 9885.6 | 617.8  | 1863.2 | 603.3  | 5431.4 | 1265.2 | 1936.5 | 1166.6 |
| ppt-MIR902b  | 4648.1 | 1132.2 | 1346.7 | 243.9  | 4047.6 | 6278.5 | 2217.6 | 698.6  |
| ppt-MIR900   | 3581.0 | 2829.5 | 1908.0 | 656.7  | 3369.8 | 4452.5 | 2077.5 | 1245.3 |
| ppt-MIR902a  | 4607.7 | 1117.7 | 1329.0 | 109.2  | 3926.1 | 6208.2 | 2167.4 | 147.9  |
| ppt-MIR898a  | 3757.2 | 1713.7 | 2433.8 | 971.7  | 4084.0 | 2358.9 | 1159.5 | 2117.6 |
| ppt-MIR1212  | 2898.7 | 2819.6 | 2145.2 | 1187.6 | 1370.7 | 2941.5 | 2094.2 | 1694.3 |
| ppt-MIR898b  | 3474.6 | 1720.0 | 2060.2 | 879.0  | 3724.2 | 1677.3 | 988.5  | 1842.2 |
| ppt-MIR160e  | 5310.2 | 1170.3 | 650.9  | 276.9  | 4014.0 | 2404.4 | 1248.4 | 329.6  |
| ppt-MIR1026b | 8081.0 | 381.9  | 1145.9 | 463.6  | 1430.5 | 465.8  | 439.6  | 522.3  |
| ppt-MIR1026a | 8068.9 | 378.3  | 1145.9 | 459.8  | 1423.6 | 463.7  | 439.6  | 516.8  |
| ppt-MIR1221  | 2785.6 | 350.2  | 241.9  | 246.4  | 5132.7 | 625.9  | 402.6  | 709.5  |
| ppt-MIR1048  | 1781.7 | 539.8  | 851.7  | 908.2  | 1561.6 | 1291.0 | 777.1  | 1820.5 |
| ppt-MIR1052  | 765.7  | 991.6  | 672.4  | 363.3  | 1112.5 | 2560.3 | 1400.0 | 1003.8 |
| ppt-MIR529b  | 1133.1 | 1437.0 | 492.2  | 618.6  | 1023.9 | 1882.8 | 649.3  | 1064.9 |
| ppt-MIR529c  | 1126.4 | 1430.6 | 493.1  | 617.3  | 997.1  | 1888.0 | 638.8  | 1058.1 |
| ppt-MIR1214  | 1107.5 | 1402.5 | 848.9  | 1004.7 | 1068.6 | 1021.5 | 891.6  | 879.0  |
| ppt-MIR477c  | 2695.5 | 1329.9 | 612.7  | 284.5  | 1272.5 | 990.5  | 421.1  | 207.6  |
| ppt-MIR529a  | 1040.2 | 1359.9 | 429.6  | 621.1  | 892.1  | 1706.2 | 600.9  | 1097.5 |
| ppt-MIR1219b | 5565.9 | 90.7   | 316.6  | 196.9  | 984.8  | 38.2   | 96.9   | 202.1  |
| ppt-MIR1065  | 950.1  | 805.6  | 1089.0 | 514.4  | 723.8  | 1449.0 | 1274.9 | 596.9  |
| ppt-MIR1217  | 2037.4 | 288.5  | 341.8  | 393.8  | 1820.5 | 1102.0 | 416.7  | 625.4  |
| ppt-MIR533c  | 1793.8 | 450.0  | 756.5  | 243.9  | 607.8  | 1183.6 | 455.5  | 367.6  |
| ppt-MIR1216  | 1082.0 | 507.1  | 632.3  | 809.1  | 754.7  | 387.3  | 270.5  | 1277.9 |
| ppt-MIR1027a | 580.0  | 419.1  | 363.3  | 445.8  | 539.1  | 492.7  | 475.8  | 1033.7 |
| ppt-MIR1027b | 580.0  | 419.1  | 363.3  | 445.8  | 539.1  | 492.7  | 475.8  | 1033.7 |
| ppt-MIR533a  | 1102.1 | 334.8  | 537.0  | 202.0  | 429.2  | 928.5  | 321.6  | 352.7  |
| ppt-MIR902e  | 690.4  | 56.2   | 94.3   | 113.0  | 1628.9 | 713.7  | 423.8  | 446.3  |
| ppt-MIR902g  | 690.4  | 56.2   | 94.3   | 111.8  | 1628.9 | 713.7  | 423.8  | 446.3  |
| ppt-MIR390a  | 651.3  | 563.4  | 423.1  | 202.0  | 693.6  | 900.6  | 396.5  | 309.3  |
| ppt-MIR902c  | 687.7  | 56.2   | 90.6   | 108.0  | 1624.1 | 707.5  | 422.9  | 438.2  |
| ppt-MIR477f  | 297.4  | 957.1  | 487.5  | 108.0  | 206.7  | 1428.4 | 423.8  | 116.7  |
| ppt-MIR390c  | 977.0  | 408.2  | 293.3  | 53.3   | 1211.4 | 674.4  | 290.7  | 90.9   |
| ppt-MIR533d  | 997.2  | 300.3  | 535.1  | 195.6  | 386.6  | 778.7  | 288.1  | 341.9  |
| ppt-MIR2083  | 873.4  | 460.9  | 386.6  | 513.2  | 583.7  | 130.1  | 100.4  | 470.7  |
| ppt-MIR477g  | 877.4  | 557.0  | 214.8  | 58.4   | 533.6  | 787.0  | 208.8  | 86.8   |
| ppt-MIR1219a | 1258.2 | 125.2  | 168.1  | 247.7  | 1060.3 | 84.7   | 74.0   | 226.5  |



|              |        |       |       |       |       |       |       |       |
|--------------|--------|-------|-------|-------|-------|-------|-------|-------|
| ppt-MIR1063d | 729.4  | 222.3 | 156.9 | 212.1 | 857.7 | 473.0 | 224.7 | 219.8 |
| ppt-MIR166l  | 378.1  | 616.9 | 380.1 | 94.0  | 519.2 | 657.9 | 226.4 | 202.1 |
| ppt-MIR537b  | 374.1  | 208.7 | 192.4 | 195.6 | 445.0 | 503.0 | 449.3 | 694.6 |
| ppt-MIR537c  | 374.1  | 208.7 | 192.4 | 195.6 | 445.0 | 503.0 | 449.3 | 694.6 |
| ppt-MIR1078  | 629.8  | 275.8 | 349.3 | 80.0  | 560.4 | 684.8 | 297.8 | 130.2 |
| ppt-MIR537d  | 602.9  | 158.8 | 141.0 | 188.0 | 588.5 | 318.1 | 219.4 | 624.0 |
| ppt-MIR902h  | 146.7  | 174.2 | 193.3 | 459.8 | 315.9 | 326.4 | 271.4 | 721.7 |
| ppt-MIR537a  | 547.7  | 155.1 | 122.3 | 143.5 | 534.3 | 305.7 | 212.3 | 552.1 |
| ppt-MIR477e  | 1041.6 | 191.4 | 234.4 | 232.4 | 318.6 | 269.6 | 86.3  | 175.0 |
| ppt-MIR1032  | 339.1  | 475.4 | 211.1 | 78.8  | 346.1 | 667.2 | 314.5 | 84.1  |
| ppt-MIR166e  | 390.3  | 313.9 | 122.3 | 100.3 | 674.4 | 390.4 | 124.2 | 367.6 |
| ppt-MIR166b  | 394.3  | 315.7 | 122.3 | 99.1  | 673.7 | 388.3 | 124.2 | 359.5 |
| ppt-MIR901   | 522.1  | 229.5 | 324.1 | 113.0 | 382.5 | 402.8 | 190.3 | 165.5 |
| ppt-MIR902i  | 103.6  | 136.1 | 144.8 | 425.5 | 259.6 | 248.9 | 236.1 | 656.6 |
| ppt-MIR477a  | 973.0  | 157.9 | 190.5 | 141.0 | 307.0 | 227.2 | 55.5  | 131.6 |
| ppt-MIR1063g | 530.2  | 161.5 | 147.6 | 224.8 | 497.2 | 229.3 | 124.2 | 251.0 |
| ppt-MIR477d  | 889.5  | 160.6 | 186.8 | 128.3 | 277.4 | 232.4 | 43.2  | 115.3 |
| ppt-MIR529d  | 395.6  | 274.0 | 167.2 | 71.1  | 401.7 | 446.2 | 146.3 | 112.6 |
| ppt-MIR477b  | 876.1  | 145.2 | 179.3 | 175.3 | 262.3 | 212.8 | 43.2  | 109.9 |
| ppt-MIR1211  | 285.3  | 444.5 | 186.8 | 151.2 | 211.5 | 361.5 | 139.2 | 183.1 |
| ppt-MIR1063e | 528.9  | 133.4 | 137.3 | 224.8 | 421.7 | 162.2 | 99.6  | 245.5 |
| ppt-MIR390b  | 294.7  | 277.6 | 211.1 | 174.0 | 259.6 | 234.4 | 130.4 | 284.9 |
| ppt-MIR899   | 662.1  | 108.9 | 145.7 | 208.3 | 333.8 | 74.4  | 51.1  | 208.9 |
| ppt-MIR171a  | 94.2   | 72.6  | 43.9  | 376.0 | 182.0 | 72.3  | 43.2  | 820.7 |
| ppt-MIR166c  | 179.0  | 257.6 | 100.9 | 99.1  | 430.6 | 160.1 | 88.1  | 354.1 |
| ppt-MIR1031b | 304.1  | 92.5  | 123.3 | 141.0 | 239.7 | 213.8 | 184.1 | 363.6 |
| ppt-MIR166d  | 174.9  | 254.9 | 100.9 | 99.1  | 422.3 | 160.1 | 88.1  | 354.1 |
| ppt-MIR1023b | 184.4  | 53.5  | 71.0  | 24.1  | 540.5 | 428.6 | 202.6 | 149.2 |
| ppt-MIR166h  | 168.2  | 254.0 | 100.9 | 100.3 | 418.2 | 160.1 | 86.3  | 363.6 |
| ppt-MIR166a  | 166.9  | 254.0 | 99.9  | 99.1  | 415.5 | 160.1 | 86.3  | 354.1 |
| ppt-MIR166g  | 166.9  | 254.0 | 99.9  | 99.1  | 415.5 | 160.1 | 86.3  | 354.1 |
| ppt-MIR166i  | 166.9  | 253.1 | 99.9  | 99.1  | 414.1 | 158.0 | 86.3  | 355.4 |
| ppt-MIR166f  | 161.5  | 246.8 | 98.1  | 96.5  | 404.5 | 152.9 | 83.7  | 335.1 |
| ppt-MIR536c  | 86.1   | 137.9 | 52.3  | 391.2 | 87.9  | 178.7 | 96.9  | 533.1 |
| ppt-MIR171b  | 51.1   | 66.2  | 39.2  | 368.4 | 144.2 | 49.6  | 35.2  | 807.1 |
| ppt-MIR1060  | 227.4  | 117.9 | 53.2  | 62.2  | 344.7 | 302.6 | 105.7 | 47.5  |

|              |       |       |       |       |       |       |      |       |
|--------------|-------|-------|-------|-------|-------|-------|------|-------|
| ppt-MIR1035  | 394.3 | 83.5  | 157.8 | 20.3  | 321.4 | 157.0 | 73.1 | 51.5  |
| ppt-MIR1222a | 441.4 | 4.5   | 13.1  | 34.3  | 631.8 | 40.3  | 22.0 | 32.6  |
| ppt-MIR1039  | 858.6 | 41.7  | 96.2  | 19.1  | 100.3 | 15.5  | 15.0 | 19.0  |
| ppt-MIR1063f | 218.0 | 102.5 | 100.9 | 193.1 | 177.9 | 95.0  | 60.8 | 208.9 |
| ppt-MIR1063b | 215.3 | 103.4 | 99.9  | 188.0 | 164.1 | 94.0  | 59.0 | 198.1 |
| ppt-MIR1033b | 366.0 | 74.4  | 88.7  | 87.6  | 125.0 | 99.2  | 75.8 | 202.1 |
| ppt-MIR1063c | 207.2 | 99.8  | 99.0  | 186.7 | 160.0 | 91.9  | 57.3 | 198.1 |
| ppt-MIR1033c | 358.0 | 76.2  | 85.0  | 87.6  | 125.0 | 93.0  | 74.9 | 199.4 |
| ppt-MIR1063a | 200.5 | 98.9  | 99.9  | 182.9 | 155.9 | 91.9  | 58.1 | 199.4 |
| ppt-MIR1063h | 199.2 | 100.7 | 99.0  | 185.4 | 155.2 | 89.9  | 57.3 | 198.1 |
| ppt-MIR902j  | 475.0 | 132.4 | 248.4 | 54.6  | 46.0  | 57.8  | 28.2 | 19.0  |
| ppt-MIR1029  | 168.2 | 213.2 | 46.7  | 58.4  | 179.2 | 201.4 | 74.0 | 103.1 |
| ppt-MIR1049  | 219.4 | 87.1  | 66.3  | 76.2  | 298.7 | 114.6 | 45.8 | 130.2 |
| ppt-MIR1033d | 327.0 | 66.2  | 78.5  | 81.3  | 116.7 | 84.7  | 71.4 | 191.3 |
| ppt-MIR1033a | 328.4 | 64.4  | 78.5  | 81.3  | 115.4 | 84.7  | 71.4 | 191.3 |
| ppt-MIR1033e | 323.0 | 64.4  | 78.5  | 81.3  | 114.0 | 84.7  | 71.4 | 191.3 |
| ppt-MIR1219c | 138.6 | 79.8  | 90.6  | 182.9 | 257.5 | 30.0  | 28.2 | 185.8 |
| ppt-MIR1059  | 137.3 | 168.7 | 84.1  | 90.2  | 147.0 | 186.9 | 76.7 | 85.5  |
| ppt-MIR1074  | 230.1 | 127.0 | 96.2  | 36.8  | 179.2 | 148.7 | 89.0 | 51.5  |
| ppt-MIR1031a | 121.1 | 30.8  | 51.4  | 144.8 | 110.6 | 104.3 | 56.4 | 336.4 |
| ppt-MIR1076  | 57.9  | 58.1  | 47.6  | 168.9 | 125.0 | 35.1  | 34.4 | 424.6 |
| ppt-MIR1030f | 262.4 | 144.2 | 87.8  | 38.1  | 130.5 | 163.2 | 67.8 | 35.3  |
| ppt-MIR2079  | 191.1 | 95.3  | 48.6  | 15.2  | 189.5 | 215.9 | 85.5 | 44.8  |
| ppt-MIR166k  | 91.5  | 164.2 | 71.0  | 78.8  | 104.4 | 86.8  | 35.2 | 170.9 |
| ppt-MIR1223c | 224.7 | 84.4  | 63.5  | 72.4  | 173.1 | 45.4  | 35.2 | 73.3  |
| ppt-MIR166j  | 60.6  | 165.1 | 74.7  | 78.8  | 96.1  | 80.6  | 36.1 | 170.9 |
| ppt-MIR536f  | 239.5 | 23.6  | 21.5  | 24.1  | 147.0 | 148.7 | 75.8 | 77.3  |
| ppt-MIR1223a | 205.9 | 55.3  | 88.7  | 116.9 | 154.5 | 24.8  | 29.1 | 78.7  |
| ppt-MIR529f  | 55.2  | 169.6 | 111.1 | 36.8  | 80.3  | 205.5 | 44.1 | 32.6  |
| ppt-MIR902f  | 47.1  | 8.2   | 13.1  | 77.5  | 111.9 | 53.7  | 44.1 | 355.4 |
| ppt-MIR1223i | 51.1  | 59.9  | 61.6  | 213.4 | 7.6   | 63.0  | 44.1 | 206.2 |
| ppt-MIR160f  | 180.3 | 38.1  | 23.3  | 35.6  | 184.7 | 123.9 | 33.5 | 85.5  |
| ppt-MIR160a  | 179.0 | 38.1  | 23.3  | 35.6  | 183.4 | 123.9 | 34.4 | 85.5  |
| ppt-MIR2082  | 65.9  | 43.5  | 52.3  | 92.7  | 102.3 | 68.2  | 59.9 | 200.8 |
| ppt-MIR902d  | 29.6  | 10.0  | 10.3  | 73.7  | 111.3 | 49.6  | 40.5 | 341.9 |
| ppt-MIR897   | 110.3 | 76.2  | 79.4  | 6.4   | 128.4 | 158.0 | 80.2 | 13.6  |

|              |       |       |      |       |       |       |      |       |
|--------------|-------|-------|------|-------|-------|-------|------|-------|
| ppt-MIR1223h | 39.0  | 50.8  | 45.8 | 202.0 | 5.5   | 56.8  | 45.8 | 202.1 |
| ppt-MIR893   | 113.0 | 85.3  | 58.8 | 27.9  | 74.9  | 140.5 | 59.9 | 33.9  |
| ppt-MIR1050  | 26.9  | 67.1  | 57.9 | 82.6  | 50.1  | 93.0  | 44.9 | 169.6 |
| ppt-MIR1056  | 49.8  | 29.9  | 32.7 | 78.8  | 65.2  | 47.5  | 22.9 | 240.1 |
| ppt-MIR1223d | 86.1  | 42.6  | 30.8 | 69.9  | 74.9  | 43.4  | 53.7 | 149.2 |
| ppt-MIR1030d | 172.3 | 64.4  | 41.1 | 34.3  | 111.3 | 47.5  | 45.8 | 29.8  |
| ppt-MIR1222d | 265.1 | 22.7  | 21.5 | 26.7  | 133.9 | 41.3  | 14.1 | 19.0  |
| ppt-MIR1223e | 52.5  | 47.2  | 76.6 | 149.9 | 16.5  | 42.3  | 21.1 | 126.2 |
| ppt-MIR1030b | 157.4 | 67.1  | 37.4 | 35.6  | 103.0 | 42.3  | 45.8 | 28.5  |
| ppt-MIR1030c | 118.4 | 67.1  | 51.4 | 54.6  | 85.8  | 35.1  | 43.2 | 55.6  |
| ppt-MIR1223g | 41.7  | 38.1  | 60.7 | 160.0 | 15.8  | 26.9  | 18.5 | 131.6 |
| ppt-MIR477h  | 185.7 | 35.4  | 40.2 | 35.6  | 64.6  | 39.2  | 16.7 | 69.2  |
| ppt-MIR2080  | 92.9  | 26.3  | 29.9 | 64.8  | 61.1  | 68.2  | 45.8 | 96.3  |
| ppt-MIR160d  | 292.0 | 1.8   | 0.9  | 1.3   | 165.5 | 4.1   | 1.8  | 2.7   |
| ppt-MIR1223f | 39.0  | 36.3  | 59.8 | 149.9 | 13.7  | 26.9  | 17.6 | 122.1 |
| ppt-MIR529e  | 6.7   | 138.8 | 76.6 | 33.0  | 1.4   | 140.5 | 26.4 | 27.1  |
| ppt-MIR1030g | 107.7 | 68.0  | 39.2 | 36.8  | 77.6  | 44.4  | 41.4 | 25.8  |
| ppt-MIR1058  | 39.0  | 71.7  | 23.3 | 45.7  | 49.4  | 50.6  | 81.1 | 65.1  |
| ppt-MIR1030a | 110.3 | 62.6  | 34.6 | 35.6  | 79.0  | 35.1  | 38.8 | 25.8  |
| ppt-MIR1030e | 102.3 | 62.6  | 34.6 | 34.3  | 83.1  | 35.1  | 40.5 | 27.1  |
| ppt-MIR1037  | 91.5  | 32.7  | 26.2 | 27.9  | 94.1  | 56.8  | 45.8 | 29.8  |
| ppt-MIR1043  | 64.6  | 108.9 | 89.7 | 45.7  | 39.8  | 16.5  | 18.5 | 5.4   |
| ppt-MIR533b  | 68.6  | 40.8  | 20.5 | 12.7  | 92.7  | 44.4  | 49.3 | 29.8  |
| ppt-MIR2084  | 99.6  | 28.1  | 25.2 | 14.0  | 92.0  | 62.0  | 22.0 | 8.1   |
| ppt-MIR1066  | 121.1 | 25.4  | 46.7 | 5.1   | 79.0  | 46.5  | 15.9 | 8.1   |
| ppt-MIR1223b | 90.2  | 22.7  | 20.5 | 43.2  | 79.0  | 13.4  | 19.4 | 58.3  |
| ppt-MIR1219d | 36.3  | 36.3  | 18.7 | 40.6  | 81.0  | 15.5  | 10.6 | 105.8 |
| ppt-MIR1054  | 53.8  | 39.0  | 43.9 | 41.9  | 31.6  | 57.8  | 15.0 | 57.0  |
| ppt-MIR1040  | 35.0  | 31.8  | 14.9 | 30.5  | 30.9  | 87.8  | 50.2 | 46.1  |
| ppt-MIR2085  | 45.8  | 30.8  | 11.2 | 8.9   | 70.0  | 54.7  | 31.7 | 19.0  |
| ppt-MIR1046  | 16.1  | 11.8  | 19.6 | 40.6  | 39.8  | 21.7  | 10.6 | 92.2  |
| ppt-MIR2081  | 39.0  | 23.6  | 22.4 | 3.8   | 37.8  | 46.5  | 44.1 | 20.3  |
| ppt-MIR160i  | 49.8  | 1.8   | 1.9  | 19.1  | 54.3  | 4.1   | 4.4  | 58.3  |
| ppt-MIR1036  | 37.7  | 28.1  | 12.1 | 12.7  | 21.3  | 30.0  | 13.2 | 25.8  |
| ppt-MIR1068  | 43.1  | 1.8   | 7.5  | 20.3  | 25.4  | 14.5  | 4.4  | 47.5  |
| ppt-MIR1223j | 12.1  | 0.9   | 9.3  | 30.5  | 7.6   | 9.3   | 6.2  | 62.4  |

|              |      |      |      |      |      |      |      |      |
|--------------|------|------|------|------|------|------|------|------|
| ppt-MIR902k  | 18.8 | 11.8 | 16.8 | 25.4 | 20.6 | 13.4 | 10.6 | 20.3 |
| ppt-MIR166m  | 12.1 | 19.1 | 11.2 | 11.4 | 12.4 | 12.4 | 9.7  | 39.3 |
| ppt-MIR902l  | 39.0 | 6.4  | 9.3  | 22.9 | 17.9 | 5.2  | 5.3  | 16.3 |
| ppt-MIR1220a | 36.3 | 13.6 | 17.7 | 29.2 | 5.5  | 4.1  | 0.9  | 13.6 |
| ppt-MIR533e  | 39.0 | 13.6 | 17.7 | 5.1  | 9.6  | 25.8 | 6.2  | 0.0  |
| ppt-MIR1220b | 32.3 | 14.5 | 8.4  | 31.8 | 5.5  | 2.1  | 0.0  | 9.5  |
| ppt-MIR160b  | 36.3 | 1.8  | 3.7  | 3.8  | 39.1 | 4.1  | 2.6  | 9.5  |
| ppt-MIR2078  | 9.4  | 12.7 | 8.4  | 2.5  | 19.2 | 14.5 | 13.2 | 13.6 |
| ppt-MIR1070  | 13.5 | 10.0 | 5.6  | 5.1  | 18.5 | 13.4 | 10.6 | 12.2 |
| ppt-MIR160h  | 40.4 | 0.0  | 1.9  | 0.0  | 35.7 | 0.0  | 0.0  | 0.0  |
| ppt-MIR2077  | 0.0  | 13.6 | 20.5 | 21.6 | 0.7  | 8.3  | 2.6  | 9.5  |
| ppt-MIR1030h | 10.8 | 11.8 | 3.7  | 5.1  | 11.7 | 3.1  | 6.2  | 6.8  |
| ppt-MIR1047  | 8.1  | 2.7  | 1.9  | 6.4  | 11.7 | 6.2  | 1.8  | 19.0 |
| ppt-MIR534b  | 18.8 | 9.1  | 5.6  | 7.6  | 8.2  | 4.1  | 0.9  | 1.4  |
| ppt-MIR529g  | 9.4  | 1.8  | 4.7  | 17.8 | 4.1  | 4.1  | 2.6  | 10.9 |
| ppt-MIR1057  | 4.0  | 2.7  | 0.9  | 8.9  | 0.7  | 6.2  | 1.8  | 28.5 |
| ppt-MIR1038  | 10.8 | 1.8  | 3.7  | 8.9  | 7.6  | 7.2  | 0.0  | 12.2 |
| ppt-MIR1222c | 2.7  | 6.4  | 0.9  | 3.8  | 8.9  | 10.3 | 7.9  | 8.1  |
| ppt-MIR1044  | 2.7  | 7.3  | 1.9  | 6.4  | 4.1  | 13.4 | 5.3  | 6.8  |
| ppt-MIR1062  | 6.7  | 4.5  | 2.8  | 2.5  | 2.1  | 6.2  | 5.3  | 13.6 |
| ppt-MIR1073  | 0.0  | 1.8  | 0.0  | 1.3  | 11.0 | 5.2  | 4.4  | 4.1  |
| ppt-MIR1051  | 2.7  | 1.8  | 0.0  | 1.3  | 6.9  | 4.1  | 1.8  | 8.1  |
| ppt-MIR419   | 6.7  | 4.5  | 4.7  | 1.3  | 2.7  | 3.1  | 0.9  | 0.0  |
| ppt-MIR1075  | 1.3  | 0.0  | 1.9  | 1.3  | 11.0 | 3.1  | 0.0  | 4.1  |
| ppt-MIR1061  | 2.7  | 1.8  | 6.5  | 0.0  | 4.1  | 5.2  | 1.8  | 0.0  |
| ppt-MIR1053  | 9.4  | 0.9  | 2.8  | 1.3  | 2.7  | 0.0  | 0.9  | 2.7  |
| ppt-MIR408b  | 5.4  | 5.4  | 0.0  | 0.0  | 4.8  | 1.0  | 0.9  | 1.4  |
| ppt-MIR1055  | 1.3  | 0.9  | 0.9  | 0.0  | 8.9  | 3.1  | 0.9  | 2.7  |
| ppt-MIR1030i | 4.0  | 2.7  | 0.0  | 0.0  | 3.4  | 4.1  | 0.0  | 2.7  |
| ppt-MIR895   | 0.0  | 4.5  | 0.9  | 0.0  | 4.1  | 3.1  | 2.6  | 0.0  |

**Supplemental Table S4.** Differentially expressed sncRNAs in *P. patens* between condition 1 and condition 2. The first column lists the two conditions in a comparison.

| Cond1 vs Cond2 | miRNA or siRNA ID | Fold change (log2) | cond 1   | cond 2   |
|----------------|-------------------|--------------------|----------|----------|
| Rehy_Dehy      | ppt-miR1028b-3p_1 | -1.84              | 40882.9  | 146475.1 |
| Rehy_Dehy      | ppt-miR319c_3     | 1.24               | 512937.5 | 217685.9 |
| Rehy_Dehy      | ppt-miR1028c-3p_1 | -2.63              | 7488     | 46255.6  |
| Rehy_Dehy      | TAS3a_55086       | -1.24              | 22009.5  | 52038.2  |
| Rehy_Dehy      | ppt-miR156a_3     | -1.62              | 6700.8   | 20548.1  |
| Rehy_Dehy      | ppt-miR1023a-3p_1 | -3.24              | 723.2    | 6832.5   |
| Rehy_Dehy      | ppt-miR1024a_2    | 1.39               | 26764.6  | 10206.7  |
| Rehy_Dehy      | ppt-miR904a-3p_1  | 1.23               | 23718.2  | 10144.9  |
| Rehy_Dehy      | ppt-miR538a_3     | -1.94              | 4723.2   | 18122.7  |
| Rehy_Dehy      | ppt-miR903_1      | -4.57              | 1920     | 45694.2  |
| Rehy_Dehy      | ppt-miR1218_1     | 1.49               | 13715.1  | 4867.5   |
| Rehy_Dehy      | ppt-miR1215_1     | -1.90              | 2950.4   | 11020.7  |
| Rehy_Dehy      | ppt-miR902a-3p_2  | -3.93              | 518.4    | 7904.8   |
| Rehy_Dehy      | TAS3a_24606       | -4.46              | 1254.4   | 27650.1  |
| Rehy_Dehy      | ppt-miR904a-5p_2  | -2.40              | 1548.8   | 8202.4   |
| Rehy_Dehy      | ppt-miR898a-5p_2  | -1.49              | 3513.6   | 9875.4   |
| Rehy_Dehy      | ppt-miR1221-5p_1  | -1.72              | 211.2    | 696.2    |
| Rehy_Dehy      | ppt-miR900-5p_1   | -1.48              | 2118.4   | 5917.4   |
| Rehy_Dehy      | ppt-miR1217-5p_1  | -1.40              | 614.4    | 1628.1   |
| Rehy_Dehy      | ppt-miR902c-3p_3  | -2.17              | 108.8    | 494.1    |
| Rehy_Dehy      | ppt-miR1026a_2    | -1.57              | 2304     | 6832.5   |
| Rehy_Dehy      | ppt-miR1212_1     | -1.10              | 5926.4   | 12733.1  |
| Rehy_Dehy      | TAS3a_4121        | -1.84              | 1318.4   | 4727.2   |
| Rehy_Dehy      | novel_miR22-3p    | -5.35              | 25.6     | 1083.5   |
| Rehy_Dehy      | ppt-miR1052_1     | -1.25              | 1612.8   | 3840.1   |
| Rehy_Dehy      | ppt-miR390c-3p_1  | -3.72              | 115.2    | 1532.7   |
| Rehy_Dehy      | TAS3a_325         | -2.49              | 1081.6   | 6085.8   |
| Rehy_Dehy      | ppt-miR1028c-5p_1 | -1.32              | 166.4    | 415.5    |
| Rehy_Dehy      | ppt-miR1065_1     | -1.21              | 2508.8   | 5805.1   |
| Rehy_Dehy      | ppt-miR1023a-5p_1 | -1.50              | 358.4    | 1016.2   |
| Rehy_Dehy      | ppt-miR1078_1     | -2.43              | 384      | 2071.6   |

|           |                  |       |        |        |
|-----------|------------------|-------|--------|--------|
| Rehy_Dehy | TAS3c_2545       | -1.42 | 608    | 1633.7 |
| Rehy_Dehy | TAS3a_2972       | -3.24 | 524.8  | 4979.8 |
| Rehy_Dehy | ppt-miR533a-3p_3 | -1.68 | 985.6  | 3149.6 |
| Rehy_Dehy | hpRNA-1          | -4.58 | 38.4   | 943.2  |
| Rehy_Dehy | ppt-miR529d_1    | -1.05 | 313.6  | 651.3  |
| Rehy_Dehy | ppt-miR1032_1    | -1.64 | 307.2  | 960    |
| Rehy_Dehy | TAS3c_1043       | -1.92 | 89.6   | 342.5  |
| Rehy_Dehy | TAS3a_208        | 1.03  | 652.8  | 320    |
| Rehy_Dehy | novel_miR13-5p   | -3.05 | 51.2   | 432.3  |
| Rehy_Dehy | ppt-miR1217-3p_1 | 1.83  | 1318.4 | 370.5  |
| Rehy_Dehy | novel_miR13-3p   | -2.27 | 140.8  | 684.9  |
| Rehy_Dehy | novel_miR22-5p   | 2.31  | 780.8  | 157.2  |
| Rehy_Dehy | TAS3c_arf        | -1.65 | 217.6  | 684.9  |
| Rehy_Dehy | novel-miR12-3p   | 4.10  | 4652.8 | 269.5  |
| Rehy_Dehy | ppt-miR536c_1    | 4.19  | 1760   | 95.4   |

**Supplemental Table S5.** Prediction of miRNA binding sites on ABA-induced genes. Scores are reported by TargetFinder. Range indicates the start and end of binding sites residing on cDNAs.

| miRNA          | gene ID         | gene symbol    | score | range     | alignment                            | query                        |
|----------------|-----------------|----------------|-------|-----------|--------------------------------------|------------------------------|
| ppt-miR477h    | Pp1s7_115V6.1   | PpABI3A        | 2.5   | 64-82     | target 5' UCGGAGCCUUUGAGGGAGC 3'     | 3' ACCUUCGGAACUCCUCU 5'      |
| ppt-miR1038-3p | Pp1s65_246V6.1  | sorbitol_dehyd | 4.5   | 729-749   | target 5' UCUGGCUUGCAUCCACCAU 3'     | 3' GGACCUACGCUAAGGUGGUAC 5'  |
| ppt-miR1220a   | Pp1s67_7V6.1    | porin          | 4.5   | 1199-1220 | target 5' CUGUCUUUCUGGCCACCUCAA 3'   | 3' GAUAG-AAGGAGUGGUGCCUU 5'  |
| ppt-miR1220b   | Pp1s67_7V6.1    | porin          | 4.5   | 1199-1220 | target 5' CUGUCUUUCUGGCCACCUCAA 3'   | 3' GAUAG-AAGGAGUGGUGCCUU 5'  |
| ppt-miR477a-5p | Pp1s7_115V6.1   | PpABI3A        | 4.5   | 64-83     | target 5' UCGGAGCCUUUGAGGGAGCC 3'    | 3' ACCUUCGGAACUCCUCUC 5'     |
| ppt-miR477b    | Pp1s7_115V6.1   | PpABI3A        | 4.5   | 64-83     | target 5' UCGGAGCCUUUGAGGGAGCC 3'    | 3' ACCUUCGGAACUCCUCUC 5'     |
| ppt-miR477c    | Pp1s7_115V6.1   | PpABI3A        | 4.5   | 64-83     | target 5' UCGGAGCCUUUGAGGGAGCC 3'    | 3' ACCUUCGGAACUCCUCUC 5'     |
| ppt-miR477d    | Pp1s7_115V6.1   | PpABI3A        | 4.5   | 64-83     | target 5' UCGGAGCCUUUGAGGGAGCC 3'    | 3' ACCUUCGGAACUCCUCUC 5'     |
| ppt-miR477e    | Pp1s7_115V6.1   | PpABI3A        | 4.5   | 64-83     | target 5' UCGGAGCCUUUGAGGGAGCC 3'    | 3' ACCUUCGGAACUCCUCUC 5'     |
| ppt-miR477f    | Pp1s7_115V6.1   | PpABI3A        | 4.5   | 60-80     | target 5' GAGGUCGGAGCCUUUGAGGGA 3'   | 3' AACACCUUCGGAACUCCUCU 5'   |
| ppt-miR477g-5p | Pp1s7_115V6.1   | PpABI3A        | 4.5   | 60-80     | target 5' GAGGUCGGAGCCUUUGAGGGA 3'   | 3' AACACCUUCGGAACUCCUCU 5'   |
| ppt-miR156a    | Pp1s381_18V6.2  | PpACT5         | 5     | 148-166   | target 5' UUGCAUACUCUCUUCUG-CG 3'    | 3' CACGAGUGAGAGAAGACAGU 5'   |
| ppt-miR156b    | Pp1s381_18V6.2  | PpACT5         | 5     | 148-166   | target 5' UUGCAUACUCUCUUCUG-CG 3'    | 3' CACGAGUGAGAGAAGACAGU 5'   |
| ppt-miR319a    | Pp1s66_200V6.1  | MYB            | 5     | 924-943   | target 5' GGAGUCUCCUUAUGCCAAU 3'     | 3' CCUCGAGGGAAGUCAGGUUC 5'   |
| ppt-miR156c    | Pp1s381_18V6.2  | PpACT5         | 5     | 148-166   | target 5' UUGCAUACUCUCUUCUG-CG 3'    | 3' CACGAGUGAGAGAAGACAGU 5'   |
| ppt-miR536f    | Pp1s7_115V6.1   | PpABI3A        | 5     | 1617-1636 | target 5' UGCAACAGCUUGGCUUGUA 3'     | 3' ACGUGUGUGAACCGUGCUU 5'    |
| ppt-miR536f    | Pp1s89_139V6.2  | sut4           | 5     | 131-150   | target 5' GUCGCGCAGCUUGGCCUGGA 3'    | 3' ACGUGUGUGAACCGUGCUU 5'    |
| novel_miR14-3p | Pp1s379_42V6.2  | lea_group3     | 5     | 1278-1298 | target 5' UCGCUCGUCUGUAAUUCUG 3'     | 3' GGUCGUAUACACAUUUAGAC 5'   |
| novel_miR15-3p | Pp1s67_7V6.1    | porin          | 5.5   | 1603-1622 | target 5' UUUUAAAGUUCACAG-UCGCA 3'   | 3' AAUUUUGUAGUGUCUAGUGU 5'   |
| ppt-miR536f    | Pp1s173_143V6.1 | PpABI3B        | 5.5   | 1233-1252 | target 5' CGCAUUAUGCUUGGCCGAGAG 3'   | 3' ACGUGUGUGAACCGUGCUU 5'    |
| ppt-miR902a-3p | Pp1s234_91V6.2  | lea_group3     | 5.5   | 420-439   | target 5' GAUGGGACGACACCUUCGCA 3'    | 3' UGAUACUACGUCUGGAAGCA 5'   |
| ppt-miR319a    | Pp1s143_30V6.1  | MYB            | 5.5   | 1422-1441 | target 5' GGGGAUCCUUCGGACCAAA 3'     | 3' CCUCGAGGGAAGUCAGGUUC 5'   |
| ppt-miR319a    | Pp1s391_54V6.1  | MYB            | 5.5   | 1496-1515 | target 5' GGGGAUCCUUCGGACCAAA 3'     | 3' CCUCGAGGGAAGUCAGGUUC 5'   |
| ppt-miR1037    | Pp1s10_147V6.1  | Phypa_159190   | 5.5   | 1225-1244 | target 5' UUGU-AAAUCCUUAUAAAGU 3'    | 3' GGUAUUUAGGAUUUUUCCGA 5'   |
| ppt-miR1046-5p | Pp1s6_369V6.1   | Phypa_113212   | 5.5   | 1042-1060 | target 5' CCUGAGAAG-AUGAAAUCU 3'     | 3' GCACUUUUUAUACUUUAGGU 5'   |
| ppt-miR1217-3p | Pp1s10_147V6.1  | Phypa_159190   | 5.5   | 1261-1280 | target 5' CUUUAUA-CAGUUUCAAUU 3'     | 3' GAACUGUAGUACGAAUUUAA 5'   |
| ppt-miR477g-3p | Pp1s213_122V6.1 | Phypa_194258   | 5.5   | 624-643   | target 5' UUUUCCAU-AAGUUUCCAA 3'     | 3' AGAGGUGUCUCCGAAGGUUG 5'   |
| ppt-miR536a    | Pp1s89_139V6.2  | sut4           | 6     | 128-150   | target 5' GUCUGCGCGCAGCUUGGCCUGGA 3' | 3' CA-ACGUGUGUGAACCGUGCUU 5' |
| ppt-miR536b    | Pp1s89_139V6.2  | sut4           | 6     | 128-150   | target 5' GUCUGCGCGCAGCUUGGCCUGGA 3' | 3' CA-ACGUGUGUGAACCGUGCUU 5' |
| ppt-miR536d    | Pp1s89_139V6.2  | sut4           | 6     | 128-150   | target 5' GUCUGCGCGCAGCUUGGCCUGGA 3' | 3' CA-ACGUGUGUGAACCGUGCUU 5' |
| ppt-miR536e    | Pp1s89_139V6.2  | sut4           | 6     | 128-150   | target 5' GUCUGCGCGCAGCUUGGCCUGGA 3' | 3' CA-ACGUGUGUGAACCGUGCUU 5' |
| ppt-miR536f    | Pp1s379_42V6.2  | lea_group3     | 6     | 1212-1232 | target 5' AGCUUAUAGUUGGACACGAA 3'    | 3' ACGUGUGUGCA-ACCGUGCUU 5'  |
| ppt-miR902a-5p | Pp1s7_115V6.1   | PpABI3A        | 6     | 640-656   | target 5' UUAGGAA-CUGCAGCAUG 3'      | 3' ACUUCUAGACGUAGUUAU 5'     |
| ppt-miR902c-3p | Pp1s234_91V6.2  | lea_group3     | 6     | 420-439   | target 5' GAUGGGACGACACCUUCGCA 3'    | 3' UGAUACUACGUCUGGAAGCA 5'   |
| ppt-miR902e-3p | Pp1s234_91V6.2  | lea_group3     | 6     | 420-439   | target 5' GAUGGGACGACACCUUCGCA 3'    | 3' UGAUACUACGUCUGGAAGCA 5'   |
| ppt-miR902g-3p | Pp1s234_91V6.2  | lea_group3     | 6     | 420-439   | target 5' GAUGGGACGACACCUUCGCA 3'    | 3' UGAUACUACGUCUGGAAGCA 5'   |
| ppt-miR1045    | Pp1s143_30V6.1  | MYB            | 6     | 1603-1623 | target 5' CGCGUCCAGGUGCCAGCAUA 3'    | 3' UUGCAGUUUUUGGUGUGUAA 5'   |
| ppt-miR1221-5p | Pp1s202_106V6.1 | Phypa_169276   | 6     | 74-94     | target 5' UUUUGGUCGCGCACCGUCCA 3'    | 3' AAACUGGGACGUGGUAGGU 5'    |
| novel_miR6     | Pp1s67_7V6.1    | porin          | 6.5   | 242-261   | target 5' UUCGUUGU-UGGGUGCUUGCA 3'   | 3' UAGUAAAAGACCCGAAAGU 5'    |
| ppt-miR160a    | Pp1s213_122V6.1 | Phypa_194258   | 6.5   | 534-554   | target 5' UUUUAUGUGGGGACCCAGGCA 3'   | 3' ACCGUUAGUCCUGGUGCCGU 5'   |
| ppt-miR160e    | Pp1s213_122V6.1 | Phypa_194258   | 6.5   | 534-554   | target 5' UUUUAUGUGGGGACCCAGGCA 3'   | 3' ACCGUUAGUCCUGGUGCCGU 5'   |
| ppt-miR160f    | Pp1s213_122V6.1 | Phypa_194258   | 6.5   | 534-554   | target 5' UUUUAUGUGGGGACCCAGGCA 3'   | 3' ACCGUUAGUCCUGGUGCCGU 5'   |
| ppt-miR477a-5p | Pp1s10_147V6.1  | Phypa_159190   | 6.5   | 1124-1143 | target 5' GGGAAUCUUUUGUGGAGAG 3'     | 3' ACCUUCGGAACUCCUCUC 5'     |
| ppt-miR477b    | Pp1s10_147V6.1  | Phypa_159190   | 6.5   | 1124-1143 | target 5' GGGAAUCUUUUGUGGAGAG 3'     | 3' ACCUUCGGAACUCCUCUC 5'     |
| ppt-miR477c    | Pp1s10_147V6.1  | Phypa_159190   | 6.5   | 1124-1143 | target 5' GGGAAUCUUUUGUGGAGAG 3'     | 3' ACCUUCGGAACUCCUCUC 5'     |
| ppt-miR477d    | Pp1s10_147V6.1  | Phypa_159190   | 6.5   | 1124-1143 | target 5' GGGAAUCUUUUGUGGAGAG 3'     | 3' ACCUUCGGAACUCCUCUC 5'     |
| ppt-miR477e    | Pp1s10_147V6.1  | Phypa_159190   | 6.5   | 1124-1143 | target 5' GGGAAUCUUUUGUGGAGAG 3'     | 3' ACCUUCGGAACUCCUCUC 5'     |
| ppt-miR533b-5p | Pp1s6_369V6.1   | Phypa_113212   | 6.5   | 746-765   | target 5' AUCUC-CACCUGAGCAGCUG 3'    | 3' GGGAGUGUGGACCUUGUCGAG 5'  |
| ppt-miR902c-3p | Pp1s202_106V6.1 | Phypa_169276   | 6.5   | 493-511   | target 5' AUU-UGAAGCAGAACUUCGA 3'    | 3' UGAUACUACGUCUGGAAGCA 5'   |
| ppt-miR902e-3p | Pp1s202_106V6.1 | Phypa_169276   | 6.5   | 493-511   | target 5' AUU-UGAAGCAGAACUUCGA 3'    | 3' UGAUACUACGUCUGGAAGCA 5'   |
| ppt-miR902g-3p | Pp1s202_106V6.1 | Phypa_169276   | 6.5   | 493-511   | target 5' AUU-UGAAGCAGAACUUCGA 3'    | 3' UGAUACUACGUCUGGAAGCA 5'   |
| ppt-miR1036-5p | Pp1s3_7V6.1     | PM_protein     | 6.5   | 627-646   | target 5' CA-CCGAUUCAGCCACCA 3'      | 3' GUCGAUUUAUGCCUGAGGUGU 5'  |
| ppt-miR1058    | Pp1s65_246V6.1  | sorbitol_dehyd | 6.5   | 1846-1866 | target 5' GUGCAUUGUGAGUAGAUUUC 3'    | 3' CACGAAGCAGUACGUUAGAGA 5'  |
| ppt-miR1219d   | Pp1s67_175V6.1  | Pp_specific_4  | 6.5   | 159-178   | target 5' CAGUU-GUGAGAGAAAGAAA 3'    | 3' UUCGAUCACUCCGUCCUUU 5'    |
| ppt-miR1222b   | Pp1s143_82V6.1  | PpABI3C        | 6.5   | 846-866   | target 5' UCUUUAUUGGAAUCCUUCAG 3'    | 3' ACAUGGUUACUUGGGAAGUC 5'   |
| ppt-miR1222c   | Pp1s143_82V6.1  | PpABI3C        | 6.5   | 846-866   | target 5' UCUUUAUUGGAAUCCUUCAG 3'    | 3' ACAUGGUUACUUGGGAAGUC 5'   |
| ppt-miR2082    | Pp1s143_82V6.1  | PpABI3C        | 6.5   | 1494-1515 | target 5' AAGAAAGGACGAGGACGACA 3'    | 3' UUCUUCUUCGCGUUGU-GUGU 5'  |

|                |                 |               |     |           |        |    |                         |    |           |       |    |                         |    |
|----------------|-----------------|---------------|-----|-----------|--------|----|-------------------------|----|-----------|-------|----|-------------------------|----|
| ppt-miR390c-3p | Pp1s381_18V6.2  | PpACT5        | 6.5 | 983-1002  | target | 5' | CGCUGAUCGGGAUGGA-AGCG   | 3' | . . . . . | query | 3' | GUUACGAGUCUUAACUGUCGC   | 5' |
| ppt-miR390c-3p | Pp1s381_21V6.1  | PpACT5        | 6.5 | 982-1001  | target | 5' | CGCUGAUCGGGAUGGA-AGCG   | 3' | . . . . . | query | 3' | GUUACGAGUCUUAACUGUCGC   | 5' |
| ppt-miR477h    | Pp1s75_99V6.1   | lea_group3    | 6.5 | 280-297   | target | 5' | UGGCAGCC-UUGAGGGCGC     | 3' | . . . . . | query | 3' | ACCUUCGGAAACUCCUCU      | 5' |
| ppt-miR536c    | Pp1s173_143V6.1 | PpABI3B       | 6.5 | 1231-1252 | target | 5' | AACGCAUAUAGCUUGGCGAGAG  | 3' | . . . . . | query | 3' | UUUCUGUUUCGAACCGUGCUA   | 5' |
| ppt-miR536f    | Pp1s143_82V6.1  | PpABI3C       | 6.5 | 1781-1800 | target | 5' | UGCACACAGCUCGGCUAGAG    | 3' | . . . . . | query | 3' | ACGUGUGUCGAACCGUGCUU    | 5' |
| ppt-miR902d-3p | Pp1s234_91V6.2  | lea_group3    | 6.5 | 420-439   | target | 5' | GAUGGGACGCAGACCUUCG     | 3' | . . . . . | query | 3' | CGAUGCUACGUCUGGAAGUA    | 5' |
| ppt-miR1033a   | Pp1s114_139V6.1 | lea_group3    | 7   | 701-720   | target | 5' | AGU-CUCACCACGACGUGUCG   | 3' | . . . . . | query | 3' | UCACGGGUAGUGCUGGGCAGU   | 5' |
| ppt-miR1033b   | Pp1s114_139V6.1 | lea_group3    | 7   | 701-720   | target | 5' | AGU-CUCACCACGACGUGUCG   | 3' | . . . . . | query | 3' | UCACGGGUAGUGCUGGGCAGU   | 5' |
| ppt-miR1033c   | Pp1s114_139V6.1 | lea_group3    | 7   | 701-720   | target | 5' | AGU-CUCACCACGACGUGUCG   | 3' | . . . . . | query | 3' | UCACGGGUAGUGCUGGGCAGU   | 5' |
| ppt-miR1033d   | Pp1s114_139V6.1 | lea_group3    | 7   | 701-720   | target | 5' | AGU-CUCACCACGACGUGUCG   | 3' | . . . . . | query | 3' | UCACGGGUAGUGCUGGGCAGU   | 5' |
| ppt-miR1033e   | Pp1s114_139V6.1 | lea_group3    | 7   | 701-720   | target | 5' | AGU-CUCACCACGACGUGUCG   | 3' | . . . . . | query | 3' | UCACGGGUAGUGCUGGGCAGU   | 5' |
| ppt-miR1048-5p | Pp1s353_22V6.1  | Pp_specific_2 | 7   | 23-44     | target | 5' | GUUGCUUACACUUGUUUAUA    | 3' | . . . . . | query | 3' | CAGCAGAUGUGAUACAAG-AU   | 5' |
| ppt-miR1059    | Pp1s7_115V6.1   | PpABI3A       | 7   | 839-860   | target | 5' | GUAGUGUACGGAGAAUUUCA    | 3' | . . . . . | query | 3' | CAACAAACA-CUUCUGAAAGU   | 5' |
| ppt-miR1073-3p | Pp1s143_30V6.1  | MYB           | 7   | 440-460   | target | 5' | CGCAAUAGUACUAGCGCCUG    | 3' | . . . . . | query | 3' | AUACUUUAUUAUUGCGGGU     | 5' |
| ppt-miR1076-3p | Pp1s67_7V6.1    | porin         | 7   | 1073-1094 | target | 5' | CGUUUGAUAAGUAGGUGG      | 3' | . . . . . | query | 3' | CGCCAC-GCUAUUGCGAAC     | 5' |
| ppt-miR1212    | Pp1s353_22V6.1  | Pp_specific_2 | 7   | 748-768   | target | 5' | CUCAUCUGAGCUGUCCUACA    | 3' | . . . . . | query | 3' | GCGUAAGAUACGACGGGUGC    | 5' |
| ppt-miR1215    | Pp1s353_22V6.1  | Pp_specific_2 | 7   | 36-57     | target | 5' | UUGUUUAUAGUUUAGCAAGUGU  | 3' | . . . . . | query | 3' | AGCAUAGUCAAAACGUU-ACU   | 5' |
| ppt-miR1222a   | Pp1s143_82V6.1  | PpABI3C       | 7   | 846-866   | target | 5' | UCUUUUAAUGGAAUCCUUCAG   | 3' | . . . . . | query | 3' | AUAUGGUUAUUGAGGAAGUU    | 5' |
| ppt-miR2080    | Pp1s33_341V6.1  | eif4          | 7   | 1425-1444 | target | 5' | CCAUUUGGAAAGUGGU-UGGA   | 3' | . . . . . | query | 3' | CGUAGACGCUUAACUUAACCU   | 5' |
| ppt-miR2082    | Pp1s379_42V6.2  | lea_group3    | 7   | 516-536   | target | 5' | GAAGGAGAAGCGAAAGAAUA    | 3' | . . . . . | query | 3' | UUUUCUUCGCCUUGUGUGU     | 5' |
| ppt-miR408b    | Pp1s114_139V6.1 | lea_group3    | 7   | 1608-1628 | target | 5' | AGCCAAAGGAAGCAGCAGGUCA  | 3' | . . . . . | query | 3' | UCGGUCCUUCUCCGUCACGU    | 5' |
| ppt-miR477h    | Pp1s169_138V6.1 | pyr_dehyd     | 7   | 282-301   | target | 5' | GGGGGCUUUUAGAAAGGAA     | 3' | . . . . . | query | 3' | ACCUUCGGAAAC-UCCUCU     | 5' |
| ppt-miR533b-5p | Pp1s34_349V6.1  | ppg4          | 7   | 238-257   | target | 5' | UCCAC-UAGCCUGGACAUGUC   | 3' | . . . . . | query | 3' | GGGAGUGUCGGACCUUGCAG    | 5' |
| ppt-miR533e    | Pp1s75_99V6.1   | lea_group3    | 7   | 1520-1541 | target | 5' | GGGGACCAAGCAGACUGGUGGC  | 3' | . . . . . | query | 3' | CUCUCGUACGUCUGA-CACUC   | 5' |
| ppt-miR536a    | Pp1s379_42V6.2  | lea_group3    | 7   | 1210-1232 | target | 5' | GCAGCUUAUAGUUGUGGCACGAA | 3' | . . . . . | query | 3' | CAACGUGUGUGCA-ACCGUGCUU | 5' |
| ppt-miR536a    | Pp1s7_115V6.1   | PpABI3A       | 7   | 1615-1636 | target | 5' | ACUGCACACAGCUUGGCUUGUA  | 3' | . . . . . | query | 3' | CAACGUGUGUGCAACCGUGCUU  | 5' |
| ppt-miR536b    | Pp1s379_42V6.2  | lea_group3    | 7   | 1210-1232 | target | 5' | GCAGCUUAUAGUUGUGGCACGAA | 3' | . . . . . | query | 3' | CAACGUGUGUGCA-ACCGUGCUU | 5' |
| ppt-miR536b    | Pp1s7_115V6.1   | PpABI3A       | 7   | 1615-1636 | target | 5' | ACUGCACACAGCUUGGCUUGUA  | 3' | . . . . . | query | 3' | CAACGUGUGUGCAACCGUGCUU  | 5' |
| ppt-miR536d    | Pp1s379_42V6.2  | lea_group3    | 7   | 1210-1232 | target | 5' | GCAGCUUAUAGUUGUGGCACGAA | 3' | . . . . . | query | 3' | CAACGUGUGUGCA-ACCGUGCUU | 5' |
| ppt-miR536d    | Pp1s7_115V6.1   | PpABI3A       | 7   | 1615-1636 | target | 5' | ACUGCACACAGCUUGGCUUGUA  | 3' | . . . . . | query | 3' | CAACGUGUGUGCAACCGUGCUU  | 5' |
| ppt-miR536e    | Pp1s379_42V6.2  | lea_group3    | 7   | 1210-1232 | target | 5' | GCAGCUUAUAGUUGUGGCACGAA | 3' | . . . . . | query | 3' | CAACGUGUGUGCA-ACCGUGCUU | 5' |
| ppt-miR536e    | Pp1s7_115V6.1   | PpABI3A       | 7   | 1615-1636 | target | 5' | ACUGCACACAGCUUGGCUUGUA  | 3' | . . . . . | query | 3' | CAACGUGUGUGCAACCGUGCUU  | 5' |
| ppt-miR893     | Pp1s143_30V6.1  | MYB           | 7   | 1612-1631 | target | 5' | GUGCCAGCACUAGUUCUCAU    | 3' | . . . . . | query | 3' | CAGGGUCGUGUUCAGGGUUA    | 5' |
| ppt-miR902a-3p | Pp1s10_181V6.1  | eifpa         | 7   | 365-383   | target | 5' | GC-AUCACGUGGGCCUUCGU    | 3' | . . . . . | query | 3' | CGAUACUACGUCUGGAAGCA    | 5' |
| ppt-miR902a-3p | Pp1s67_175V6.1  | Pp_specific_4 | 7   | 1010-1028 | target | 5' | CGAAUGAUGUAGA-CUUUGU    | 3' | . . . . . | query | 3' | CGAUACUACGUCUGGAAGCA    | 5' |
| ppt-miR902b-3p | Pp1s10_181V6.1  | eifpa         | 7   | 365-383   | target | 5' | GC-AUCACGUGGGCCUUCGU    | 3' | . . . . . | query | 3' | CGAUACUACGUCUGGAAGCA    | 5' |
| ppt-miR902b-3p | Pp1s67_175V6.1  | Pp_specific_4 | 7   | 1010-1028 | target | 5' | CGAAUGAUGUAGA-CUUUGU    | 3' | . . . . . | query | 3' | CGAUACUACGUCUGGAAGCA    | 5' |
| ppt-miR902c-3p | Pp1s67_175V6.1  | Pp_specific_4 | 7   | 1010-1028 | target | 5' | CGAAUGAUGUAGA-CUUUGU    | 3' | . . . . . | query | 3' | UGAUACUACGUCUGGAAGCA    | 5' |
| ppt-miR902e-3p | Pp1s67_175V6.1  | Pp_specific_4 | 7   | 1010-1028 | target | 5' | CGAAUGAUGUAGA-CUUUGU    | 3' | . . . . . | query | 3' | UGAUACUACGUCUGGAAGCA    | 5' |
| ppt-miR902f-3p | Pp1s169_138V6.1 | pyr_dehyd     | 7   | 144-162   | target | 5' | GUUA-GUUGCAGCAGUUUGU    | 3' | . . . . . | query | 3' | CAAUACUACGUCUAGAAGCA    | 5' |
| ppt-miR902f-3p | Pp1s67_175V6.1  | Pp_specific_4 | 7   | 1010-1028 | target | 5' | CGAAUGAUGUAGA-CUUUGU    | 3' | . . . . . | query | 3' | CAAUACUACGUCUAGAAGCA    | 5' |
| ppt-miR902g-3p | Pp1s67_175V6.1  | Pp_specific_4 | 7   | 1010-1028 | target | 5' | CGAAUGAUGUAGA-CUUUGU    | 3' | . . . . . | query | 3' | UGAUACUACGUCUGGAAGCA    | 5' |
| ppt-miR902h-3p | Pp1s143_82V6.1  | PpABI3C       | 7   | 2579-2598 | target | 5' | GCUU-UGAUGUAGAUUUC      | 3' | . . . . . | query | 3' | CAAUACUACUACUGGAAGCA    | 5' |
| ppt-miR902k-5p | Pp1s7_115V6.1   | PpABI3A       | 7   | 637-656   | target | 5' | ACCUUAGGAA-CUGCACAUG    | 3' | . . . . . | query | 3' | UUUACUUAAGACGUUGUAU     | 5' |
| ppt-miR902l-5p | Pp1s7_115V6.1   | PpABI3A       | 7   | 637-656   | target | 5' | ACCUUAGGAA-CUGCACAUG    | 3' | . . . . . | query | 3' | UUUACUUAAGACGUUGUAU     | 5' |
| ppt-miR903     | Pp1s379_42V6.2  | lea_group3    | 7   | 646-668   | target | 5' | GCUAUGGUGCUGCUGAUGUAGC  | 3' | . . . . . | query | 3' | CGAG-AACAGGGCGGUUAUCG   | 5' |
| ppt-miR1046-5p | Pp1s213_122V6.1 | Phypa_194258  | 7   | 1467-1485 | target | 5' | UGU-AUAGAUAGUAUUCUG     | 3' | . . . . . | query | 3' | GCACUUUUUAUCUUUAGGU     | 5' |
| ppt-miR1215    | Pp1s4_10V6.1    | Phypa_112415  | 7   | 488-508   | target | 5' | UUGUACUAGGUUAUGCGAUGU   | 3' | . . . . . | query | 3' | AGCAUAGUCAAAACGUUACU    | 5' |
| ppt-miR1219d   | Pp1s10_147V6.1  | Phypa_159190  | 7   | 785-804   | target | 5' | AAGCU-GUGAGUGCCAAAGAA   | 3' | . . . . . | query | 3' | UUCGACACUCCUGCUUUU      | 5' |
| ppt-miR477h    | Pp1s10_147V6.1  | Phypa_159190  | 7   | 1124-1142 | target | 5' | GGGAAGUCUUUGUGGAGA      | 3' | . . . . . | query | 3' | ACCUUCGGAAACUCCUCU      | 5' |
| ppt-miR536f    | Pp1s213_122V6.1 | Phypa_194258  | 7   | 1356-1376 | target | 5' | UGUUUUAAGGCUUGGCAAGAA   | 3' | . . . . . | query | 3' | ACGUG-UGUGCAACCGUGCUU   | 5' |
| novel_miR6     | Pp1s114_139V6.1 | lea_group3    | 7   | 113-133   | target | 5' | AUUGUGUUGUUGGUGUUUCA    | 3' | . . . . . | query | 3' | UAGUAAAAGCCACGAAAGU     | 5' |
| novel_miR14-3p | Pp1s381_21V6.1  | PpACT5        | 7.5 | 1736-1756 | target | 5' | CCUGAAUAUUUGUAUUUUG     | 3' | . . . . . | query | 3' | GGUCGGUAUACACAUUUAGAC   | 5' |
| novel_miR10    | Pp1s211_95V6.1  | rehydrin      | 7.5 | 109-129   | target | 5' | UUUCGGUGUGUCGAGAGAGU    | 3' | . . . . . | query | 3' | ACAGUCACACACUCUUUCU     | 5' |
| novel_miR6     | Pp1s143_82V6.1  | PpABI3C       | 7.5 | 273-294   | target | 5' | AUAGUUGUUUGGGUGGAUUA    | 3' | . . . . . | query | 3' | UAGUAA-AAGACCCAGAAAGU   | 5' |
| novel_miR16    | Pp1s173_143V6.1 | PpABI3B       | 7.5 | 512-532   | target | 5' | GCCCGAGAAGUCCCAACUAU    | 3' | . . . . . | query | 3' | CGAGUUUUUAGGUUGGUGU     | 5' |
| novel_miR17-5p | Pp1s33_341V6.1  | eif4          | 7.5 | 1617-1636 | target | 5' | ACAAGUA-GAUCCGAAUGU     | 3' | . . . . . | query | 3' | UGUUCGUUUUAGGCUAGGCU    | 5' |
| novel_miR17-5p | Pp1s379_42V6.2  | lea_group3    | 7.5 | 157-177   | target | 5' | ACAGCCUAGAGUCCGCUUCGU   | 3' | . . . . . | query | 3' | UGUUCGUUUUAGGCUAGGCU    | 5' |
| ppt-miR1031a   | Pp1s42_233V6.1  | Phypa_122983  | 7.5 | 464-484   | target | 5' | GGGCGAUCAGAGAGCUUUGG    | 3' | . . . . . | query | 3' | UCUUCGAGGUCUCUGUAACU    | 5' |



|                  |                 |                |               |                                     |       |                                      |
|------------------|-----------------|----------------|---------------|-------------------------------------|-------|--------------------------------------|
| ppt-miR1031b     | Pp1s42_233V6.1  | Phypa_122983   | 7.5 464-484   | target 5' GGGCGAUC AAGAGACUUUGG 3'  | ..... | query 3' UCUUCGAGGUCUCUGUAACU 5'     |
| ppt-miR1052      | Pp1s42_233V6.1  | Phypa_122983   | 7.5 243-264   | target 5' UACCACCAAGGACAAGGAG 3'    | ..... | query 3' AUGGUGUUAGUUUU-UUCCUU 5'    |
| ppt-miR1053-5p   | Pp1s10_147V6.1  | Phypa_159190   | 7.5 973-995   | target 5' AGUCCAGUUGAGA-AACAUAUA 3' | ..... | query 3' UUCAGGUGAAACUCUAUUGGGUAG 5' |
| ppt-miR1220a     | Pp1s202_106V6.1 | Phypa_169276   | 7.5 153-174   | target 5' CUCGUCGUGGUCGCCCGGAA 3'   | ..... | query 3' GA-UAGAAAGGAGUGGUGCCUU 5'   |
| ppt-miR1220b     | Pp1s202_106V6.1 | Phypa_169276   | 7.5 153-174   | target 5' CUCGUCGUGGUCGCCCGGAA 3'   | ..... | query 3' GA-UAGAAAGGAGUGGUGCCUU 5'   |
| ppt-miR319d-5p.1 | Pp1s6_369V6.1   | Phypa_113212   | 7.5 230-250   | target 5' UAUUGCACCGAACAAGAACUU 3'  | ..... | query 3' AUAACCGGCUUCU-UCGAG 5'      |
| ppt-miR893       | Pp1s141_128V6.1 | Phypa_190133   | 7.5 559-578   | target 5' CUCAAGGACAGGUGCAAGU 3'    | ..... | query 3' CAGGGUCGUGUACAGGGUUA 5'     |
| ppt-miR893       | Pp1s241_56V6.1  | Phypa_27775    | 7.5 549-567   | target 5' CUCUC-GCACAAGCUCU 3'      | ..... | query 3' CAGGGUCGUGUACAGGGUUA 5'     |
| ppt-miR902d-3p   | Pp1s213_122V6.1 | Phypa_194258   | 7.5 902-921   | target 5' GGUUACUAGCACAUCUCU 3'     | ..... | query 3' CGAUUCUACGUCUGGAAGUA 5'     |
| ppt-miR1023a-3p  | Pp1s173_143V6.1 | PpABI3B        | 7.5 956-976   | target 5' AGGCGCACUUAACAAUUCUUG 3'  | ..... | query 3' UACGUGAGAGAGGUUAAGAGA 5'    |
| ppt-miR1027a     | Pp1s12_126V6.1  | per1           | 7.5 389-410   | target 5' AGUUGGAUUGGAGCAUUGAA 3'   | ..... | query 3' CUAACCU-UCUCUUCUAUCUUU 5'   |
| ppt-miR1027b     | Pp1s12_126V6.1  | per1           | 7.5 389-410   | target 5' GGUUGGAUUGGAGCAUUGAA 3'   | ..... | query 3' CUAACCU-UCUCUUCUAUCUUU 5'   |
| ppt-miR1038-3p   | Pp1s227_58V6.1  | lea_group3     | 7.5 332-352   | target 5' UCUGCAGUGGAAUCCACCAAG 3'  | ..... | query 3' GGACCUACGCUAAGGUGGUAC 5'    |
| ppt-miR1038-5p   | Pp1s196_69V6.1  | Pp_specific_3  | 7.5 930-948   | target 5' CGUU-GCGGAGCGAGCCUG 3'    | ..... | query 3' GAAACCAACCUUUGCGUGAU 5'     |
| ppt-miR1043-5p   | Pp1s67_175V6.1  | Pp_specific_4  | 7.5 1083-1102 | target 5' UGGAUGUUUGGUAAGU 3'       | ..... | query 3' ACGUGGUAACUUC 5'            |
| ppt-miR1044-3p   | Pp1s114_139V6.1 | lea_group3     | 7.5 1975-1994 | target 5' AAAACUGAUGUGUACCCCA 3'    | ..... | query 3' UUUUGUUUAACGUGAUGUU 5'      |
| ppt-miR1044-3p   | Pp1s65_246V6.1  | sorbitol_dehyd | 7.5 380-399   | target 5' AACGCAACGUGCACCAUA 3'     | ..... | query 3' UUUUGUUUAACGUGAUGUU 5'      |
| ppt-miR1047-3p   | Pp1s89_139V6.2  | sut4           | 7.5 438-458   | target 5' CGUCCAGCCUACGUUGUCA 3'    | ..... | query 3' GUUGAUCCAGUAGCGACUAGU 5'    |
| ppt-miR1049      | Pp1s143_82V6.1  | PpABI3C        | 7.5 1661-1681 | target 5' ACAUGGUUUGGUAAGGAGA 3'    | ..... | query 3' UCUGACAACCGAUUGUCUCU 5'     |
| ppt-miR1050      | Pp1s34_349V6.1  | ppg4           | 7.5 1013-1033 | target 5' CGUUCGGAGCAAGGUGGACG 3'   | ..... | query 3' UCCGGCCUAGUUCACCAGU 5'      |
| ppt-miR1057      | Pp1s196_69V6.1  | Pp_specific_3  | 7.5 634-654   | target 5' AUCCCAUGUACAACA-AGGAA 3'  | ..... | query 3' UGGGGGUCGUAUCUUGUUCUU 5'    |
| ppt-miR1065      | Pp1s7_115V6.1   | PpABI3A        | 7.5 1715-1736 | target 5' CUAGCGUAAGUUAAGAUUGA 3'   | ..... | query 3' GA-CGCUCUACGUCUCUGACA 5'    |
| ppt-miR1211-5p   | Pp1s169_138V6.1 | pyr_dehyd      | 7.5 42-62     | target 5' UUUUACUCCUCCUCCU 3'       | ..... | query 3' GAACGUUUUGGUAAGGAGGGA 5'    |
| ppt-miR160a      | Pp1s353_22V6.1  | Pp_specific_2  | 7.5 881-900   | target 5' UGG-AAGCAGUGAGUUAGGUA 3'  | ..... | query 3' ACCGUUAGUCCUCCGUGCCGU 5'    |
| ppt-miR160e      | Pp1s353_22V6.1  | Pp_specific_2  | 7.5 881-900   | target 5' UGG-AAGCAGUGAGUUAGGUA 3'  | ..... | query 3' ACCGUUAGUCCUCCGUGCCGU 5'    |
| ppt-miR160f      | Pp1s353_22V6.1  | Pp_specific_2  | 7.5 881-900   | target 5' UGG-AAGCAGUGAGUUAGGUA 3'  | ..... | query 3' ACCGUUAGUCCUCCGUGCCGU 5'    |
| ppt-miR319d-5p.2 | Pp1s234_91V6.2  | lea_group3     | 7.5 426-447   | target 5' GGGGGCCUUUGAAGGGAACCA 3'  | ..... | query 3' CGUGU-UGGAAGGAGUGUGG 5'     |
| ppt-miR477a-5p   | Pp1s169_138V6.1 | pyr_dehyd      | 7.5 282-302   | target 5' GGGGGCCUUUGAAGGGAACCA 3'  | ..... | query 3' ACCUUCGAAAC-UCCUCUC 5'      |
| ppt-miR477b      | Pp1s169_138V6.1 | pyr_dehyd      | 7.5 282-302   | target 5' GGGGGCCUUUGAAGGGAACCA 3'  | ..... | query 3' ACCUUCGAAAC-UCCUCUC 5'      |
| ppt-miR477c      | Pp1s169_138V6.1 | pyr_dehyd      | 7.5 282-302   | target 5' GGGGGCCUUUGAAGGGAACCA 3'  | ..... | query 3' ACCUUCGAAAC-UCCUCUC 5'      |
| ppt-miR477d      | Pp1s169_138V6.1 | pyr_dehyd      | 7.5 282-302   | target 5' GGGGGCCUUUGAAGGGAACCA 3'  | ..... | query 3' ACCUUCGAAAC-UCCUCUC 5'      |
| ppt-miR477e      | Pp1s169_138V6.1 | pyr_dehyd      | 7.5 282-302   | target 5' GGGGGCCUUUGAAGGGAACCA 3'  | ..... | query 3' ACCUUCGAAAC-UCCUCUC 5'      |
| ppt-miR477h      | Pp1s1_740V6.1   | Pp_specific_1  | 7.5 2-19      | target 5' UGACG-CUUUGAGGCACG 3'     | ..... | query 3' ACCUUCGAAACUCCUCU 5'        |
| ppt-miR533a-5p   | Pp1s67_175V6.1  | Pp_specific_4  | 7.5 542-561   | target 5' CCUCCACA-CCUCCAGCUC 3'    | ..... | query 3' GGGAGUGUCGACCGGUCGAG 5'     |
| ppt-miR536d      | Pp1s143_82V6.1  | PpABI3C        | 7.5 1779-1800 | target 5' UUUACACAGCUCGCUAGAG 3'    | ..... | query 3' CAACGUGUGCGAACCGGUCUU 5'    |
| ppt-miR536e      | Pp1s143_82V6.1  | PpABI3C        | 7.5 1779-1800 | target 5' UUUACACAGCUCGCUAGAG 3'    | ..... | query 3' CAACGUGUGCGAACCGGUCUU 5'    |
| ppt-miR893       | Pp1s173_143V6.1 | PpABI3B        | 7.5 1138-1156 | target 5' GUCUU-UUACAAGAUCCAAG 3'   | ..... | query 3' CAGGGUCGUGUACAGGGUUA 5'     |
| ppt-miR893       | Pp1s32_160V6.1  | fqr1           | 7.5 541-561   | target 5' UUAUCAGCAGGUUCUCAAG 3'    | ..... | query 3' CAGGGUCGUGUUC-AGGGUUA 5'    |
| ppt-miR897       | Pp1s227_58V6.1  | lea_group3     | 7.5 71-92     | target 5' UGUGUCGUAUUGGUAUCG 3'     | ..... | query 3' AAACGACUACAAGGUGAACUAGU 5'  |
| ppt-miR898a-3p   | Pp1s381_21V6.1  | PpACT5         | 7.5 1319-1339 | target 5' UGUCAUGUGCACAGUCUACC 3'   | ..... | query 3' AUAGCGACGUGACGGAUCG 5'      |
| ppt-miR902a-3p   | Pp1s169_138V6.1 | pyr_dehyd      | 7.5 144-162   | target 5' GUUA-GUUGCAGCAGUUUGU 3'   | ..... | query 3' CGAUACUACGUCUGGAAGCA 5'     |
| ppt-miR902a-5p   | Pp1s211_95V6.1  | rehydrin       | 7.5 1796-1814 | target 5' AGGAGAAGCUGCACCAUA 3'     | ..... | query 3' ACUUCUAGACGUAGU-AU 5'       |
| ppt-miR902a-5p   | Pp1s75_99V6.1   | lea_group3     | 7.5 421-438   | target 5' UGGACAAACUGCAACAGA 3'     | ..... | query 3' ACUUCUAGACGUAGU 5'          |
| ppt-miR902b-3p   | Pp1s169_138V6.1 | pyr_dehyd      | 7.5 144-162   | target 5' GUUA-GUUGCAGCAGUUUGU 3'   | ..... | query 3' CGAUACUACGUCUGGAAGCA 5'     |
| ppt-miR902c-3p   | Pp1s10_181V6.1  | elipa          | 7.5 365-383   | target 5' GC-AUCACGUGGCCUUCGU 3'    | ..... | query 3' UGAUACUACGUCUGGAAGCA 5'     |
| ppt-miR902d-3p   | Pp1s65_246V6.1  | sorbitol_dehyd | 7.5 428-446   | target 5' GC-GCGUUGAGAGUUUAC 3'     | ..... | query 3' CGAUACUACGUCUGGAAGCA 5'     |
| ppt-miR902e-3p   | Pp1s10_181V6.1  | elipa          | 7.5 365-383   | target 5' GC-AUCACGUGGCCUUCGU 3'    | ..... | query 3' UGAUACUACGUCUGGAAGCA 5'     |
| ppt-miR902g-3p   | Pp1s10_181V6.1  | elipa          | 7.5 365-383   | target 5' GC-AUCACGUGGCCUUCGU 3'    | ..... | query 3' UGAUACUACGUCUGGAAGCA 5'     |
| ppt-miR902j-5p   | Pp1s7_115V6.1   | PpABI3A        | 7.5 638-657   | target 5' CCUAGGAA-CUGCAGCAUGU 3'   | ..... | query 3' UUAUCUUAAGACGUUGUAU 5'      |
| ppt-miR902k-5p   | Pp1s65_246V6.1  | sorbitol_dehyd | 7.5 577-596   | target 5' GAAUGAAGAGU-GGCGACAU 3'   | ..... | query 3' UUUACUUCUAGACGUUGUAU 5'     |
| ppt-miR902l-5p   | Pp1s65_246V6.1  | sorbitol_dehyd | 7.5 577-596   | target 5' GAAUGAAGAGU-GGCGACAU 3'   | ..... | query 3' UUUACUUCUAGACGUUGUAU 5'     |
| ppt-miR1025      | Pp1s143_82V6.1  | PpABI3C        | 8 2095-2115   | target 5' GUUUUJAGUUUGCUGUCUA 3'    | ..... | query 3' CAUAUUCGAAACACACCGU 5'      |
| ppt-miR1027a     | Pp1s118_232V6.1 | lea_group3     | 8 205-225     | target 5' GAUUUGGAGAGGAGAGGAG 3'    | ..... | query 3' CUAACCUUCUUCUUCUUCUU 5'     |
| ppt-miR1027a     | Pp1s7_115V6.1   | PpABI3A        | 8 1731-1750   | target 5' GAUU-GAAGUGAAGGCAGAGC 3'  | ..... | query 3' CUAACCUUCUUCUUCUUCUU 5'     |
| ppt-miR1027b     | Pp1s118_232V6.1 | lea_group3     | 8 205-225     | target 5' GAUUUGGAGAGGAGAGGAG 3'    | ..... | query 3' CUAACCUUCUUCUUCUUCUU 5'     |
| ppt-miR1027b     | Pp1s7_115V6.1   | PpABI3A        | 8 1731-1750   | target 5' GAUU-GAAGUGAAGGCAGAGC 3'  | ..... | query 3' CUAACCUUCUUCUUCUUCUU 5'     |
| ppt-miR1028c-3p  | Pp1s353_22V6.1  | Pp_specific_2  | 8 654-675     | target 5' GCUAGUAGACCCACAUGAUCG 3'  | ..... | query 3' CGAGAAUUUGGAGUUAC-GGU 5'    |
| ppt-miR1030j     | Pp1s65_246V6.1  | sorbitol_dehyd | 8 1328-1348   | target 5' UGUUGUGGUGCUUAGUCGG 3'    | ..... | query 3' ACCACGUCCAGUCUACGUCC 5'     |
| ppt-miR1032      | Pp1s169_138V6.1 | pyr_dehyd      | 8 1314-1333   | target 5' GUCAGAUCGUGCAG-CACU 3'    | ..... | query 3' GGGUUAAGGUCGUCAGUGGA 5'     |

|                |                 |                |             |                                     |                           |                                       |
|----------------|-----------------|----------------|-------------|-------------------------------------|---------------------------|---------------------------------------|
| ppt-miR1039-5p | Pp1s65_246V6.1  | sorbitol_dehyd | 8 232-252   | target 5' UUGAGGAGAAGAACGCCAAAGA 3' | . : . . . . . : . . . . . | query 3' GUCCUCUCUUUCUGGGUUUUU 5'     |
| ppt-miR1041    | Pp1s34_349V6.1  | ppg4           | 8 635-655   | target 5' AGGACAAAGCCUUAACCGAAGA 3' | . . . . . : . . . . .     | query 3' UCCUGGUGAGAGUGGGUUUUU 5'     |
| ppt-miR1043-3p | Pp1s89_139V6.2  | sut4           | 8 806-827   | target 5' AGAUUUUCAGUUUCACGCACAC 3' | . . . . . : . . . . .     | query 3' UC-GGAAGUUUAAGUCCGCGUU 5'    |
| ppt-miR1048-5p | Pp1s196_69V6.1  | Pp_specific_3  | 8 24-43     | target 5' GUCGAAUACUUUG-GUUUUC 3'   | . . . . . : . . . . .     | query 3' CAGCAGAUACUUGUAACAAGAU 5'    |
| ppt-miR1054    | Pp1s353_22V6.1  | Pp_specific_2  | 8 278-298   | target 5' AAGAAGUGGGUUGAGGGUUUA 3'  | . . . . . : . . . . .     | query 3' GUCCUUUAUCUCUCCCAAAU 5'      |
| ppt-miR1075    | Pp1s196_69V6.1  | Pp_specific_3  | 8 532-551   | target 5' GCGGAAAUCCUGACUG-GGCA 3'  | . . . . . : . . . . .     | query 3' CAUCUUUGGUACUGACUUUGU 5'     |
| ppt-miR1217-5p | Pp1s143_82V6.1  | PpABI3C        | 8 2125-2144 | target 5' GCGAUUCGCGACUUGA-ACUA 3'  | . . . . . : . . . . .     | query 3' CGGUAAACGUUGUACUUAUGGU 5'    |
| ppt-miR1219a   | Pp1s173_143V6.1 | PpABI3B        | 8 272-292   | target 5' UAGCUAGUCAGGUGGUAUGAU 3'  | . . . . . : . . . . .     | query 3' UUCGAUCACUCUCCGUCCUUC 5'     |
| ppt-miR1219b   | Pp1s173_143V6.1 | PpABI3B        | 8 272-292   | target 5' UAGCUAGUCAGGUGGUAUGAU 3'  | . . . . . : . . . . .     | query 3' UUCGAUCACUCUCCGUCCUUC 5'     |
| ppt-miR1219c   | Pp1s173_143V6.1 | PpABI3B        | 8 272-292   | target 5' UAGCUAGUCAGGUGGUAUGAU 3'  | . . . . . : . . . . .     | query 3' UUCGAUCACUCUCCGUCCUUC 5'     |
| ppt-miR1219d   | Pp1s173_143V6.1 | PpABI3B        | 8 272-292   | target 5' UAGCUAGUCAGGUGGUAUGAU 3'  | . . . . . : . . . . .     | query 3' UUCGAUCACUCUCCGUCCUUC 5'     |
| ppt-miR1222d   | Pp1s143_82V6.1  | PpABI3C        | 8 2033-2053 | target 5' UAUGGCGUGAACCCCAAGAC 3'   | . . . . . : . . . . .     | query 3' AUAUGGUCACUUGGGAAUUU 5'      |
| ppt-miR160c    | Pp1s353_22V6.1  | Pp_specific_2  | 8 881-900   | target 5' UGG-AAGCAGUGAUUAGGUA 3'   | . . . . . : . . . . .     | query 3' ACCGUACGUCCUCGGUCCGC 5'      |
| ppt-miR2078    | Pp1s379_42V6.2  | lea_group3     | 8 363-384   | target 5' GCAGGAGAAAGCAGGCGACACC 3' | . . . . . : . . . . .     | query 3' UGUCCGUGUCCGUCCGU-UGG 5'     |
| ppt-miR2078    | Pp1s75_99V6.1   | lea_group3     | 8 1055-1075 | target 5' GCAGGAGAAAGCAGGCGAAGC 3'  | . . . . . : . . . . .     | query 3' UGUCCGUGUCCGUCCGUUGG 5'      |
| ppt-miR2082    | Pp1s379_42V6.2  | lea_group3     | 8 330-350   | target 5' GAAGGAGAGAGCUAACAUCU 3'   | . . . . . : . . . . .     | query 3' UUUUCUUCUCGCUUGUGUGU 5'      |
| ppt-miR2083-3p | Pp1s143_82V6.1  | PpABI3C        | 8 828-848   | target 5' ACUUCUGAUGCUUUUCAAUUCU 3' | . . . . . : . . . . .     | query 3' AGAAGAACGUGAGCAGUUAAG 5'     |
| ppt-miR319a    | Pp1s7_115V6.1   | PpABI3A        | 8 976-995   | target 5' GGUCUUUCUCAAUCCUGG 3'     | . . . . . : . . . . .     | query 3' CCUCGAGGGAAGUCAGGUUC 5'      |
| ppt-miR319b    | Pp1s7_115V6.1   | PpABI3A        | 8 976-995   | target 5' GGUCUUUCUCAAUCCUGG 3'     | . . . . . : . . . . .     | query 3' CCUCGAGGGAAGUCAGGUUC 5'      |
| ppt-miR390c-3p | Pp1s10_181V6.1  | elipa          | 8 120-140   | target 5' CAUCUCAGCUUGGGCGCG 3'     | . . . . . : . . . . .     | query 3' GUUACGAGUCUUGGCGUCGC 5'      |
| ppt-miR390c-3p | Pp1s379_42V6.2  | lea_group3     | 8 882-901   | target 5' CAAAACCCAGGAUGGAUA-UG 3'  | . . . . . : . . . . .     | query 3' GUUACGAGUCUUAUCCUGUCGC 5'    |
| ppt-miR408b    | Pp1s234_91V6.2  | lea_group3     | 8 443-463   | target 5' AGCCAAGUGGAGGCGAGGGA 3'   | . . . . . : . . . . .     | query 3' UCGGUCCUUCUCCGUCACGU 5'      |
| ppt-miR477a-5p | Pp1s7_115V6.1   | PpABI3A        | 8 1665-1685 | target 5' UGAGGAGUCUUUCAAAGGAUAG 3' | . . . . . : . . . . .     | query 3' AC-CUUCGGAAACUCCUCUC 5'      |
| ppt-miR477a-5p | Pp1s75_99V6.1   | lea_group3     | 8 280-298   | target 5' UGGCAGCC-UUGAGGGGCGC 3'   | . . . . . : . . . . .     | query 3' ACCUUCGGAACUCCUCUC 5'        |
| ppt-miR477b    | Pp1s7_115V6.1   | PpABI3A        | 8 1665-1685 | target 5' UGAGGAGUCUUUCAAAGGAUAG 3' | . . . . . : . . . . .     | query 3' AC-CUUCGGAAACUCCUCUC 5'      |
| ppt-miR477b    | Pp1s75_99V6.1   | lea_group3     | 8 280-298   | target 5' UGGCAGCC-UUGAGGGGCGC 3'   | . . . . . : . . . . .     | query 3' ACCUUCGGAACUCCUCUC 5'        |
| ppt-miR477c    | Pp1s7_115V6.1   | PpABI3A        | 8 1665-1685 | target 5' UGAGGAGUCUUUCAAAGGAUAG 3' | . . . . . : . . . . .     | query 3' AC-CUUCGGAAACUCCUCUC 5'      |
| ppt-miR477c    | Pp1s75_99V6.1   | lea_group3     | 8 280-298   | target 5' UGGCAGCC-UUGAGGGGCGC 3'   | . . . . . : . . . . .     | query 3' ACCUUCGGAACUCCUCUC 5'        |
| ppt-miR477d    | Pp1s7_115V6.1   | PpABI3A        | 8 1665-1685 | target 5' UGAGGAGUCUUUCAAAGGAUAG 3' | . . . . . : . . . . .     | query 3' AC-CUUCGGAAACUCCUCUC 5'      |
| ppt-miR477e    | Pp1s75_99V6.1   | lea_group3     | 8 280-298   | target 5' UGGCAGCC-UUGAGGGGCGC 3'   | . . . . . : . . . . .     | query 3' ACCUUCGGAACUCCUCUC 5'        |
| ppt-miR477h    | Pp1s114_139V6.1 | lea_group3     | 8 751-769   | target 5' AAGGAGUCUUCGAAAGGAGG 3'   | . . . . . : . . . . .     | query 3' ACCUUCGGAACUCCUCUC 5'        |
| ppt-miR529a    | Pp1s65_246V6.1  | sorbitol_dehyd | 8 2220-2240 | target 5' GAGCUCUCUCUUUAUGUUUG 3'   | . . . . . : . . . . .     | query 3' CCCGACACGAGAGAGAGAAGC 5'     |
| ppt-miR529b    | Pp1s65_246V6.1  | sorbitol_dehyd | 8 2220-2240 | target 5' GAGCUCUCUCUUUAUGUUUG 3'   | . . . . . : . . . . .     | query 3' CCCGACACGAGAGAGAGAAGC 5'     |
| ppt-miR529c    | Pp1s65_246V6.1  | sorbitol_dehyd | 8 2220-2240 | target 5' GAGCUCUCUCUUUAUGUUUG 3'   | . . . . . : . . . . .     | query 3' CCCGACACGAGAGAGAGAAGC 5'     |
| ppt-miR533b-5p | Pp1s7_115V6.1   | PpABI3A        | 8 983-1002  | target 5' CCUUA- AUCCUGGACAGAAU 3'  | . . . . . : . . . . .     | query 3' GGGAGUGUCGGACCGUGCGAG 5'     |
| ppt-miR536f    | Pp1s33_341V6.1  | eif4           | 8 1105-1124 | target 5' UGCGCACAAUUGGGACGCG 3'    | . . . . . : . . . . .     | query 3' ACGUGUGUCGAAACCGUGCUU 5'     |
| ppt-miR893     | Pp1s89_139V6.2  | sut4           | 8 841-861   | target 5' GUCGCGUGUGCAAUUAUGAUAG 3' | . . . . . : . . . . .     | query 3' CAG-GGUGGUGUCUAGGGUUA 5'     |
| ppt-miR902a-5p | Pp1s381_18V6.2  | PpACT5         | 8 1058-1075 | target 5' GGAAGGAUCUGUAUGGGA 3'     | . . . . . : . . . . .     | query 3' ACUUCUAGACGUAGUAU 5'         |
| ppt-miR902a-5p | Pp1s381_21V6.1  | PpACT5         | 8 1057-1074 | target 5' GGAAGGAUCUGUAUGGGA 3'     | . . . . . : . . . . .     | query 3' ACUUCUAGACGUAGUAU 5'         |
| ppt-miR902c-3p | Pp1s169_138V6.1 | pyr_dehyd      | 8 144-162   | target 5' GUUA-GUUGCACAGCUUUGU 3'   | . . . . . : . . . . .     | query 3' UGAUACUACGUCUGGAAGCA 5'      |
| ppt-miR902e-3p | Pp1s169_138V6.1 | pyr_dehyd      | 8 144-162   | target 5' GUUA-GUUGCACAGCUUUGU 3'   | . . . . . : . . . . .     | query 3' UGAUACUACGUCUGGAAGCA 5'      |
| ppt-miR902g-3p | Pp1s169_138V6.1 | pyr_dehyd      | 8 144-162   | target 5' GUUA-GUUGCACAGCUUUGU 3'   | . . . . . : . . . . .     | query 3' UGAUACUACGUCUGGAAGCA 5'      |
| ppt-miR902h-5p | Pp1s114_139V6.1 | lea_group3     | 8 695-713   | target 5' AUGAAGAGUCU-CACCACGA 3'   | . . . . . : . . . . .     | query 3' UACUUCUUAUGAUGUAUUU 5'       |
| ppt-miR902i-5p | Pp1s114_139V6.1 | lea_group3     | 8 695-713   | target 5' AUGAAGAGUCU-CACCACGA 3'   | . . . . . : . . . . .     | query 3' UACUUCUUAUGAUGUAUUU 5'       |
| novel_miR14-3p | Pp1s143_82V6.1  | PpABI3C        | 8 1570-1589 | target 5' CGGGUCAUUCUG-GAAUCUC 3'   | . . . . . : . . . . .     | query 3' GGUCGGUAUACAAUUUAGAC 5'      |
| novel_miR14-5p | Pp1s32_160V6.1  | fqr1           | 8 398-417   | target 5' UGCAGAUUUAACCCA-AUGCCG 3' | . . . . . : . . . . .     | query 3' GUGUCUAAAUGUGUAUACCGA 5'     |
| novel_miR14-5p | Pp1s75_99V6.1   | lea_group3     | 8 1911-1932 | target 5' AACAAGUUUUGCAUUGUAGCU 3'  | . . . . . : . . . . .     | query 3' GUG-UCUAAAUGUGUAUACCGA 5'    |
| novel_miR5     | Pp1s118_232V6.1 | lea_group3     | 8 200-220   | target 5' CAAGGGAUUUGGAGAGGAGAA 3'  | . . . . . : . . . . .     | query 3' CUUCACUAGACUCCGUUUU 5'       |
| novel_miR6     | Pp1s65_246V6.1  | sorbitol_dehyd | 8 1323-1344 | target 5' AUCGGUUGUGGGUGCUUAUG 3'   | . . . . . : . . . . .     | query 3' UAG-UAAAAGCCACGAAAGU 5'      |
| novel_miR7     | Pp1s118_232V6.1 | lea_group3     | 8 22-46     | target 5' UAUCUACGACUUAUUAUCCUCG 3' | . . . . . : . . . . .     | query 3' AUAUAAGGUUGAAGUAAG-UAGUGU 5' |
| novel_miR12-5p | Pp1s7_115V6.1   | PpABI3A        | 8 1706-1726 | target 5' CAGAAACAGCUAGCGGUUAAGU 3' | . . . . . : . . . . .     | query 3' GUAGGUGUUUUCGUCGUUA 5'       |
| novel_miR11    | Pp1s353_22V6.1  | Pp_specific_2  | 8 330-351   | target 5' GAUGGGAAUCGGAUUUAGAAG 3'  | . . . . . : . . . . .     | query 3' CUACUUUUUG-CGAAGUCUUU 5'     |
| ppt-miR2080    | Pp1s241_56V6.1  | Phypa_27775    | 8 115-134   | target 5' GCAGC-GAGGGCUGAUGUGU 3'   | . . . . . : . . . . .     | query 3' CGUAGACGCUUAACUUAUCCU 5'     |
| ppt-miR2082    | Pp1s6_369V6.1   | Phypa_113212   | 8 541-561   | target 5' GAAAAGAUCCGUGUAGACAG 3'   | . . . . . : . . . . .     | query 3' UUUUCUUCGCGCUUGUGUGU 5'      |
| ppt-miR902a-5p | Pp1s10_147V6.1  | Phypa_159190   | 8 1073-1090 | target 5' UGUCGGAUACGCGUCAUA 3'     | . . . . . : . . . . .     | query 3' ACUUCUAGACGUAGUAU 5'         |

**Supplemental Table S6.** Mapping statistics of known TAS Loci in *P. patens*. Included in the table are initiating miRNAs and their binding sites on TAS genes.

| name  | genomic or cDNA loci          | plus strand |           | minus strand |           | miRNA       | score | range     | target                              | alignment | query                              |
|-------|-------------------------------|-------------|-----------|--------------|-----------|-------------|-------|-----------|-------------------------------------|-----------|------------------------------------|
|       |                               | #. Reads    | 20-22nt % | #. Reads     | 20-22nt % |             |       |           |                                     |           |                                    |
| TAS3a | scaffold_61_112817_113633_+   | 37722       | 87.0%     | 121350       | 97.7%     | ppt-miR390  | 2.5   | 376-396   | target 5' GGCGUUAUCCUCUUGAGCUG 3'   | .....     | query 3' CCGCGAUAGGGAGGACUCGAA 5'  |
|       |                               |             |           |              |           |             |       | 6 609-630 | target 5' GUUGUAUAUCACUCCUGAGCUA 3' | :.:.:     | query 3' CCGCG-AUAGGGAGGACUCGAA 5' |
| TAS3b | scaffold_13_2972400_2972613_- | 792         | 92.0%     | 1211         | 98.2%     | ppt-miR390  | 4     | 5-25      | target 5' GGCGUAACCCUUCUGAGCUA 3'   | :::..     | query 3' CCGCGAUAGGGAGGACUCGAA 5'  |
| TAS3c | scaffold_37_2031106_2031372_+ | 12542       | 88.5%     | 16078        | 94.9%     | ppt-miR390  | 4     | 5-25      | target 5' GACGCUACCCUUCUGAGCUA 3'   | :.....    | query 3' CCGCGAUAGGGAGGACUCGAA 5'  |
| TAS3d | scaffold_2_4439987_4440271_-  | 621         | 96.6%     | 1268         | 98.7%     | ppt-miR390  | 0     | 4-24      | target 5' GGCGCUAUCCUCCUGAGCUU 3'   | .....     | query 3' CCGCGAUAGGGAGGACUCGAA 5'  |
| TAS3e | scaffold_1_812885_813642_+    | 305         | 95.4%     | 500          | 84.2%     | ppt-miR390  | 1.5   | 430-450   | target 5' GGCGUUAUCCUCCUGAGCUG 3'   | .....     | query 3' CCGCGAUAGGGAGGACUCGAA 5'  |
| TAS6  | scaffold_61_112309_112535_+   | 243         | 86.0%     | 720          | 95.0%     | ppt-miR156a | 1     | 890-909   | target 5' GUGAUCACUCUCUUGUCA 3'     | ::.....   | query 3' CACGAGUGAGAGAAGACAGU 5'   |



novel-miR12 scaffold\_81\_496623\_496872+\_599 Ppls91\_206V6.1 7 13-34 DNAJ-like 20

query 3' CGUUCACGUAGAUGU-AGGUGU 5'  
:: :::: ::::: :::::  
target 5' GCTAGTGGATCTGCATTTTACATTCTGAAGTGTAGCATTGAGAGAGTGAGCGGAGAGCTGTACGGAGTTGCTCGATTTTGGTGTAGGAATTGAATTTTAAAGATATCGCGGTTGCCACCTA 3'  
GCATTTTACATTCTGAAGTGTAGC\_16  
ATTCTGAAGTGTAGCATTGAGAGA\_4  
CTGAAGTGTAGCATTGAGAGAGTG\_1  
GAGTGAGCGGAGAGCTGTACGGAG\_2

novel-miR13 scaffold\_99\_649008\_649257+\_1138 Ppls29\_335V6.1 7.5 1590-1609 prenylated RAB acceptor 1.H

query 3' CCGUGUUGUAGAUAGUGUCA 5'  
: ::::: :::::  
target 5' TGGACAGCAGTCTGCACAGAGCAAACAAGTACCAGGACTACCAGTGAAGGTAGTAAAGCTGAAACAATAG 3'  
CAGTCTGCACAGAGCAAACAAGTA\_1  
TCTGCACAGAGCAAACAAGTACCA\_23  
ACAGAGCAAACAAGTACCAGGACT\_1  
AGCAAACAAGTACCAGGACTACCA\_2

novel-miR18 scaffold\_83\_1142106\_1142255-\_725 Ppls28\_211V6.1 8 1582-1602 PRP38 family protein

query 3' UCAAUGGGGUCAGUUAGAUAU 5'  
:: ::: ::::: :::::  
target 5' AGCTACAGCAGTTACTTTGTAGTTATTGGCTCGAGAAAATTGGTGAATTGTGATAATTACGCTGGATGGAGGATTATATTTCTTTTTCCTGAGAATTCCTACGCGGGGAACAATTTATCG 3'  
TACAGCAGTTACTTTGTAGTTATT\_3  
AGTTACTTTGTAGTTATTGGCTCG\_1  
TTACTTTGTAGTTATTGGCTCGAG\_153  
TCGAGAAAATTGGTGAATTGTGAT\_1  
GAAAATTGGTGAATTGTGATAATT\_1  
TTGGTGAATTGTGATAATTACGCT\_1  
TGAATTGTGATAATTACGCTGGAT\_1  
ATTGTGATAATTACGCTGGATGGA\_3  
TTGTGATAATTACGCTGGATGGAG\_1  
TGTGATAATTACGCTGGATGGAGG\_1  
AATTACGCTGGATGGAGGATTATA\_1  
ATTACGCTGGATGGAGGATTATAT\_1  
TACGCTGGATGGAGGATTATATT\_1  
ACGCTGGATGGAGGATTATATTC\_2  
CTGGATGGAGGATTATATTTCTTT\_1  
TTATATTTCTTTTTCCTGAGAATT\_1  
ATATTTCTTTTTCCTGAGAATTC\_2  
TATTTCTTTTTCCTGAGAATTC\_1  
TTTCTTTTTCCTGAGAATTCCTA\_1  
TCCTTTTTCCTGAGAATTCCTACG\_2  
TTTTTTCCTGAGAATTCCTACGCG\_2  
TTTTCTGAGAATTCCTACGCG\_1  
TCCTGAGAATTCCTACGCGGGA\_1

**Supplemental File S2.** Twenty two targets of siRNAs, their functional annotation and alignment of reads from degradome profiling

```
scaffold_342_334404_334853+_368+_389      Pp1s343_50V6.1 4.5      653-673 GroES-like family protein
query  3' AUCUCAGGUGAAGAUUUUGGAAG 5'
      :::::  ::  ::::::::::::::
target 5' TAGAGGCAATCTGAACTTAGCCTTAACATTCTAATTAGATGAGCACAGAATTATAACAACCACTTTTCTCGCTTGTGACTCTGGATGATACTCTCTTTTTGTATGAATAGTTGAGT 3'
      CTGAACCTTAGCCTTAACATTCTA_4
      TGAACCTTAGCCTTAACATTCTAA_6
      CTAATTAGATGAGCACAGAATTAT_1
      GAGCACAGAATTATAACAACCACT_3
      ATAACAACCACTTTTCTCGCTTGTG_4
      AACCACTTTTCTCGCTTGTGAC_4
      TTCTCGCTTGTGACTCTGGATG_1
      TCTTTTTGTATGAATAGTTGAGT_1
```

```
scaffold_342_334404_334853+_388+_126      Pp1s4_450V6.1 5      525-545 DUTP-PYROPHOSPHATASE-LIKE 1
query  3' CGGCUGGAAAGAUAGUUUUU 5'
      :::::  ::  ::::::  ::  :
target 5' TCCGACTTTACTATCAAAGCAGGGGACCGAATCGCCCACTTATTCTAGAGCTTATCATCACTCCTGATGTGATGGAAGTTGATGATCTAGATGCTACTGCCCCTGGAGACGGTGGATTG 3'
      CGACTTTACTATCAAAGCAGGGGA_2
      CTTTACTATCAAAGCAGGGGACCG_1
      TTTACTATCAAAGCAGGGGACCGA_3
      TTACTATCAAAGCAGGGGACCGAA_2
      ATCAAAGCAGGGGACCGAATCGCC_19
      GGGACCGAATCGCCCACTTATTC_1
      CGCCCACTTATTCTAGAGCTTAT_1
      CCCCACTTATTCTAGAGCTTATCA_2
      CAACTTATTCTAGAGCTTATCATC_4
      ATTCTAGAGCTTATCATCACTCCT_7
      ATCATCACTCCTGATGTGATGGAA_1
      TCACTCCTGATGTGATGGAAGTTG_2
      GATGTGATGGAAGTTGATGATCTA_1
      TGGAAGTTGATGATCTAGATGCTA_3
      GAAGTTGATGATCTAGATGCTACT_1
      AAGTTGATGATCTAGATGCTACTG_1
      TTGATGATCTAGATGCTACTGCC_1
      ATCTAGATGCTACTGCCCCTGGAG_1
      TCTAGATGCTACTGCCCCTGGAGA_2
      GATGCTACTGCCCCTGGAGACGGT_1
      ATGCTACTGCCCCTGGAGACGGTG_2
      TGCTACTGCCCCTGGAGACGGTG_1
```

scaffold\_342\_334404\_334853+\_388+\_126 Ppls466\_14V6.2 5.5 1539-1559 expansin A1  
 query 3' CGGCUGGAAAGAUAGUUUUUU 5'  
 :: :::: ::::::::::: ::  
 target 5' GCAGGCCGTCATCGATGAGAAGGTAGCTGCAGTTGTTGGTCTTCTGTAGCGGAAGCCGCTGCAGGTGACTTCTATTTCAGGTGTTGATTGCAATATATTTTGGATTTATGGGGTCTCA 3'  
 GCAGGCCGTCATCGATGAGAAGG\_1  
 TATCGATGAGAAGGTAGCTGCAGT\_2  
 ATCGATGAGAAGGTAGCTGCAGTT\_29  
 TAGCTGCAGTTGTTGGTCTTCTGT\_2  
 GTCTTCTGTAGCGGAAGCCGCTG\_1  
 GTAGCGGAAGCCGCTGCAGGTGA\_1  
 GTGACTTCTATTTCAGGTGTTGATT\_1

scaffold\_4\_4023891\_4025101+\_862+\_136 Ppls233\_42V6.1 5.5 843-863 translation initiation factor 3 subunit H1  
 query 3' CGUCUAGGAAGGUGCUUACUC 5'  
 :: ::::::::::: ::  
 target 5' ACAAATCCTTTCATGAAAAGAATCTGGAATTTTTCATCGAGTGTATGGACGATCTTCCATGGAGCAGCAGAAGTCCAATATTATTATCGTAACTTGTC AAGCAGCAAGTTCAGCAAC 3'  
 TTCATGAAAAGAATCTGGAATTT\_1  
 ATGAAAAGAATCTGGAATTTT\_54  
 TTTGATCGAGTGTATGGACGATCT\_2  
 TATGGACGATCTTCCATGGAGCA\_1  
 ATGGACGATCTTCCATGGAGCAG\_10  
 TGGACGATCTTCCATGGAGCAGC\_1  
 GATCTTCCATGGAGCAGCAGAAG\_2  
 TTCCATGGAGCAGCAGAAGTCCA\_5  
 CAGAAGTCCAATATTATTATCGT\_9  
 TATTATTATCGTAACTTGTC AAGG\_2  
 ATTATTATCGTAACTTGTC AAGGC\_3  
 TTATTATCGTAACTTGTC AAGGCA\_2  
 TATTATCGTAACTTGTC AAGGCAG\_1

scaffold\_4\_4023891\_4025101+\_862+\_136 Ppls76\_75V6.1 5 209-228 Ribosomal S17 family protein

query 3' CGUCUAGGAAGGUGCUUACUC 5'

::: ::: ::::: .: :::

target 5' GCAATCATTCCATCGAAGAGGCTTCGCAATAAGATCGCAGGATTTGCCACTCATTGTGATGAAGCGTATCCAGAGGGGACCAGTGCCTGGAATTTCCCTGAAGTTGCAGGAAGAGGAGCGT 3'

CAATCATTCCATCGAAGAGGCTTC\_1

TTCCATCGAAGAGGCTTCGCAATA\_3

TCCATCGAAGAGGCTTCGCAATA\_1

ATCGAAGAGGCTTCGCAATAAGAT\_126

GAAGAGGCTTCGCAATAAGATCGC\_1

AAGAGGCTTCGCAATAAGATCGCA\_1

AGGCTTCGCAATAAGATCGCAGGA\_1

AATAAGATCGCAGGATTTGCCACT\_3

ATAAGATCGCAGGATTTGCCACTC\_2

TAAGATCGCAGGATTTGCCACTCA\_3

AAGATCGCAGGATTTGCCACTCAT\_5

AGATCGCAGGATTTGCCACTCATT\_2

GATCGCAGGATTTGCCACTCATT\_2

ATCGCAGGATTTGCCACTCATTG\_8

GCAGGATTTGCCACTCATTGTGATG\_3

CAGGATTTGCCACTCATTGTGATGA\_5

AGGATTTGCCACTCATTGTGATGA\_2

TTTGCCACTCATTGTGATGAAGCGT\_2

TTGCCACTCATTGTGATGAAGCGTA\_1

TGCCACTCATTGTGATGAAGCGTAT\_1

CACTCATTGTGATGAAGCGTATCCA\_2

CTCATTGTGATGAAGCGTATCCAGA\_1

TCATTGTGATGAAGCGTATCCAGAG\_6

CATTGTGATGAAGCGTATCCAGAGG\_1

ATTTGTGATGAAGCGTATCCAGAGGG\_1

TTTGTGATGAAGCGTATCCAGAGGGG\_3

TTGTGATGAAGCGTATCCAGAGGGGA\_4

TGTGATGAAGCGTATCCAGAGGGGAC\_3

GATGAAGCGTATCCAGAGGGGACC\_1

ATGAAGCGTATCCAGAGGGGACCA\_6

TGAAGCGTATCCAGAGGGGACCAG\_1

AAGCGTATCCAGAGGGGACCAGTG\_1

AGCGTATCCAGAGGGGACCAGTGC\_1

GTATCCAGAGGGGACCAGTGCCTG\_2

TATCCAGAGGGGACCAGTGCCTGG\_6

ATCCAGAGGGGACCAGTGCCTGGA\_14

TCCAGAGGGGACCAGTGCCTGGA\_1

CCAGAGGGGACCAGTGCCTGGAAT\_4

CAGAGGGGACCAGTGCCTGGAATT\_1

AGAGGGGACCAGTGCCTGGAATTT\_10

GAGGGGACCAGTGCCTGGAATTT\_1

AGGGGACCAGTGCCTGGAATTTCC\_1

GGGGACCAGTGCCTGGAATTTCC\_1

GGACCAGTGCCTGGAATTTCCCT\_7

GACCAGTGCCTGGAATTTCCCTGA\_2

ACCAGTGCCTGGAATTTCCCTGAA\_1

CCAGTGCCTGGAATTTCCCTGAAG\_1

CAGTGCCTGGAATTTCCCTGAAGT\_9

AGTGCCTGGAATTTCCCTGAAGTT\_1

GTGCTGGAATTTCCCTGAAGTTG\_1

TGCGTGAATTTCCCTGAAGTTGC\_3

GTGGAATTTCCCTGAAGTTGCAGG\_2

GAATTTCCCTGAAGTTGCAGGAAG\_1



TCCCTGAAGTTGCAGGAAGAGGAG\_4  
CCTGAAGTTGCAGGAAGAGGAGCG\_1  
CTGAAGTTGCAGGAAGAGGAGCGT\_2

scaffold\_4\_4023891\_4025101+\_930+\_197 Pp1s72\_71V6.1 5 3030-3050 MA3 domain-containing protein  
query 3' CGAAUUUUGUCAGAUAGAGUUC 5'

target 5' GTTTTGAGCAGTGTGCACAAGTGATTCTCATTTTCACAGACAATCAAGTTTTGTTTCGTGAACCGCG 3'  
GTTTTGAGCAGTGTGCACAAGTGA\_2  
CAGTGTGCACAAGTGATTCTCATT\_7  
AGTGTGCACAAGTGATTCTCATT\_2  
GTGTGCACAAGTGATTCTCATTTT\_1  
TGTGCACAAGTGATTCTCATTTTC\_39  
TGCACAAGTGATTCTCATTTTCAC\_1  
ACAAGTGATTCTCATTTTCACAGA\_1  
CAAGTGATTCTCATTTTCACAGAC\_1  
AAGTGATTCTCATTTTCACAGACA\_2  
TGATTCTCATTTTCACAGACAATC\_2  
TTCTCATTTTCACAGACAATCAAG\_2  
TCTCATTTTCACAGACAATCAAGT\_1  
CTCATTTTCACAGACAATCAAGTT\_1  
TCATTTTCACAGACAATCAAGTT\_2  
ATTTTCACAGACAATCAAGTTTG\_4  
TTTTTCACAGACAATCAAGTTTGT\_3  
TTTCACAGACAATCAAGTTTGT\_4  
TTCACAGACAATCAAGTTTGTTC\_1  
ACAGACAATCAAGTTTGTTCGTG\_4  
CAGACAATCAAGTTTGTTCGTGA\_1  
AGACAATCAAGTTTGTTCGTGAA\_3

scaffold\_4\_4023891\_4025101+\_931+\_158 Pp1s101\_2V6.1 5 528-547 photosystem I subunit E-2

query 3' CCGAAUUUUGUCAGAUAGUU 5'  
 :::: ::::::::::: :::

target 5' AGCTTGAGCAGTCTGCCTAAACTCTCTGTAACCTTTCTCATGTCTTTGCCTTAAGATATACTCGCTGAGAATGTATTTATAAATGTTACTATCTTATTTTTTCGCGATAGATACTGTGAATC 3'  
 AGCTTGAGCAGTCTGCCTAAACTC\_6  
 GCTTGAGCAGTCTGCCTAAACTCT\_9  
 AGCAGTCTGCCTAAACTCTCTGTA\_9  
 CAGTCTGCCTAAACTCTCTGTAAC\_110  
 TCTGCCTAAACTCTCTGTAACCTT\_533  
 TGCTAAACTCTCTGTAACCTTCT\_40  
 CCTAAACTCTCTGTAACCTTCTCA\_4  
 AACTCTCTGTAACCTTCTCATGTC\_9  
 CTCTCTGTAACCTTCTCATGTCTT\_53  
 CTTTCTCATGTCTTTGCCTTAAGA\_18  
 TTTCTCATGTCTTTGCCTTAAGAT\_39  
 TTCTCATGTCTTTGCCTTAAGATA\_43  
 TCATGTCTTTGCCTTAAGATATACT\_72  
 CATGTCTTTGCCTTAAGATATACT\_42  
 TTTGCCTTAAGATATACTCGCTGA\_44  
 TTGCCTTAAGATATACTCGCTGAG\_45  
 AAGATATACTCGCTGAGAATGTAT\_24  
 TGTATTTATAAATGTTACTATCTT\_1  
 GTATTTATAAATGTTACTATCTTA\_7  
 TTTATAAATGTTACTATCTTATTT\_20  
 GTTACTATCTTATTTTTTCGCGATA\_10  
 TTATTTTTTCGCGATAGATACTGTG\_1  
 ATTTTTTCGCGATAGATACTGTGAA\_11

TAS3a\_421\_-129 Pp1s222\_28V6.1 5.5 77-99

query 3' CCGCUUUUAUCCA-CUCGACCCC 5'  
 ::::::::::: :::: :::: ::::

target 5' GGTGGAGATTGGTAGAGATGGGTGGAGGCATCGCCAGGCCACGCCCTTGCGAGCAAGTGGGTGCCCGGGCTGCACCGAGCCGTGATTCAGCGCGACATTC AATATTCAGTCCATCGTCGTA 3'  
 GGTGGAGATTGGTAGAGATGGGTG\_1  
 AGAGATGGGTGGAGGCATCGCCAG\_157  
 GAGATGGGTGGAGGCATCGCCAGG\_17  
 AGATGGGTGGAGGCATCGCCAGGC\_1  
 ATGGGTGGAGGCATCGCCAGGCC\_9  
 GGTGGAGGCATCGCCAGGCCAC\_10  
 AGGCATCGCCAGGCCACGCCCTT\_1  
 GTGATTCAGCGCGACATTC AATA\_3  
 AGCGCGACATTC AATATTCAGTCC\_1

TAS3a\_448+\_984 Pp1s143\_131V6.4 5.5 2001-2022 membrane protein, putative

query 3' ACGAA-UUGUGGGCGAUUGUU 5'  
 : :::: ::::::::::: ::::

target 5' TTCTTCGACACCACGCTACTGAACCTGGGGTAGTGGTGCCACTAGCGCCATCTTCTCCATCTGACCCTGTAATTCGCGGACGTCAACTAGGTCTTCAAGAATTTCTCACACGCTCAGTC 3'  
 ACGTACTGAACCTGGGGTAGTGG\_9  
 CGTACTGAACCTGGGGTAGTGGT\_2  
 TGGGGTAGTGGTGCCACTAGCGGC\_1  
 CTTCTCCATCTGACCCTGTAAT\_6  
 ATCCTGACCCTGTAATTCGCGGA\_41  
 TAATTCGCGGACGTCAACTAGGTCT\_8  
 AATTCGCGGACGTCAACTAGGTCT\_1  
 CCGGGACGTCAACTAGGTCTTCAA\_1  
 AGGTCTTCAAGAATTTCTCACACG\_1  
 TCTTCAAGAATTTCTCACACGCTC\_10

TAS3a\_449+\_236 Ppls360\_33V6.1 5 1396-1416 Chaperone DnaJ-domain superfamily protein

```
query 3' UUACGAAUUGUGGGCGAUUGU 5'
      :::: : :::: ::::: :::::
target 5' AATGATCAGCAGCTCGCAACAGGTTACTCGGAAATGTTCAATTCTGCTGGTAACATATGTAGTCCATTTTCGGATGGATTTTCGTGTGGTTT 3'
      AATGATCAGCAGCTCGCAACAGGT_1
      TGATCAGCAGCTCGCAACAGGTTA_1
      ATCAGCAGCTCGCAACAGGTTACT_2
      TCAGCAGCTCGCAACAGGTTACTC_1
      CAGCTCGCAACAGGTTACTCGGAA_4
      CTCGCAACAGGTTACTCGGAAATG_1132
      GCAACAGGTTACTCGGAAATGTTTC_1
      CAGGTTACTCGGAAATGTTCAATT_1
      GTTACTCGGAAATGTTCAATTCTG_1
      TTACTCGGAAATGTTCAATTCTGC_2
      TACTCGGAAATGTTCAATTCTGCT_8
      CTCGGAAATGTTCAATTCTGCTGG_2
      TCGGAAATGTTCAATTCTGCTGGT_1
      TCTGCTGGTAACATATGTAGTCCA_1
      TGCTGGTAACATATGTAGTCCATT_1
      CTGGTAACATATGTAGTCCATTC_2
      TGGTAACATATGTAGTCCATTTTCG_1
      GGTAACATATGTAGTCCATTTCCG_1
      GTAACATATGTAGTCCATTTTCGGA_5
      AACATATGTAGTCCATTTTCGGATG_1
      ATATGTAGTCCATTTTCGGATGGAT_1
      TATGTAGTCCATTTTCGGATGGATT_3
      ATGTAGTCCATTTTCGGATGGATTT_2
      TGTAGTCCATTTTCGGATGGATTTTC_4
      TAGTCCATTTTCGGATGGATTTTCGT_2
      GTCCATTTTCGGATGGATTTTCGTGT_1
      TCCATTTTCGGATGGATTTTCGTGT_2
```

TAS3a\_467-\_131 Ppls52\_243V6.2 5.5 1695-1716 Cytokine-induced anti-apoptosis inhibitor 1, Fe-S biogenesis

```
query 3' GUAAACUUACGUUGUGA-GGAU 5'
      :: ::::: ::::: ::::
target 5' CAATTGAAAGCAGTTCTACCTGTAGTTACATGATGCAATAACATGCTAAGCTCCTTTCATAAGTTTCTATCATGTTCCCTCATAGATATCTGCTGCAGAAGCTACTATTAATCGATCATCTTG 3'
      TTGAAAGCAGTTCTACCTGTAGTT_2
      AAAGCAGTTCTACCTGTAGTTACA_1
      TTCTACCTGTAGTTACATGATGCA_716
      GTTACATGATGCAATAACATGCTA_2
      CATGATGCAATAACATGCTAAGCT_1
      ATGATGCAATAACATGCTAAGCTC_1
      GATGCAATAACATGCTAAGCTCCT_10
      TGCAATAACATGCTAAGCTCCTTT_4
      AATAACATGCTAAGCTCCTTTCAT_5
      AACATGCTAAGCTCCTTTCATAAG_1
      CATGCTAAGCTCCTTTCATAAGTT_2
      TCATAAGTTTCTATCATGTTCCCTC_1
      CATAAGTTTCTATCATGTTCCCTCA_1
      TTTCTATCATGTTCCCTCATAGATA_9
      TCATGTTCCCTCATAGATATCTGCT_6
      TCTGCTGCAGAAGCTACTATTAAT_13
      TGCTGCAGAAGCTACTATTAATCG_3
      GCAGAAGCTACTATTAATCGATCA_2
      CAGAAGCTACTATTAATCGATCAT_10
      AGAAGCTACTATTAATCGATCATC_6
```

TAS3a\_472\_-\_209 Ppls321\_30V6.1 5.5 3090-3110 H(+)-ATPase 6  
 query 3' CUUACGUUGGAGGAUGCGUU 5'  
 .:. .:. .:. .:. .:. .:. .:. .:  
 target 5' TGATCCAGCAGTCCTACACAGTCTAAAGCACCAGAAGCAAATGTGCTAAGAGTCTAATTCAGTCTTGGCCTAGTTTGTAGTAATTCGTTTACTGTGCGCCATAAAAAGCTTAGCAATGAGAA 3'  
 TCCAGCAGTCCTACACAGTCTAAA\_1  
 TCCTACACAGTCTAAAGCACCAGA\_14  
 CAGTCTAAAGCACCAGAAGCAAAT\_1  
 TCTAAAGCACCAGAAGCAAATGTG\_1  
 TAAAGCACCAGAAGCAAATGTGCT\_1  
 AGCACCAGAAGCAAATGTGCTAAG\_1  
 AGAAGCAAATGTGCTAAGAGTCTA\_1  
 GAGTCTAATTCAGTCTTGGCCTAG\_1  
 GTCTTGGCCTAGTTTGTAGTAATTC\_1  
 TAGTTTGTAGTAATTCGTTTACTG\_2  
 GTAATTCGTTTACTGTGCGCCATA\_1  
 TAATTCGTTTACTGTGCGCCATAA\_1

TAS3a\_472\_-\_209 Ppls221\_76V6.1 5.5 1188-1209 photosystem II BY  
 query 3' CUUAC-GUUGGAGGAUGCGUU 5'  
 .:. .:. .:. .:. .:. .:. .:. .:  
 target 5' CGATGTTAAAACCTCCTACGAAGGGTGGAAAGAGATTCAAGAGCGTCATCGGAGCCACCGGAATCAGCTTAGCTGCAAGCTCACTGTTGGCTGCCCCGAAGCCGATGCTCAGGTGCAAGAGA 3'  
 CTCCCTACGAAGGGTGGAAAGAGAT\_12  
 GGTGGAAAGAGATTCAAGAGCGTC\_4  
 GATTCAAGAGCGTCATCGGAGCCA\_14  
 TCAGCTTAGCTGCAAGCTCACTGT\_10  
 GCTTAGCTGCAAGCTCACTGTTGG\_12  
 GCAAGCTCACTGTTGGCTGCCCC\_1  
 TGTGGCTGCCCCGAAGCCGATG\_2

TAS3a\_485\_-\_281 Ppls234\_30V6.7 5.5 2792-2810 Major facilitator superfamily protein  
 query 3' GAUGCGUUCUGGGAUCGAUA 5'  
 .:. .:. .:. .:. .:. .:. .:. .:  
 target 5' TTAGCAATCTCCTAGTTAGAATTGTTGTGTCGGAAATCTGACAATATTTTCGTAATCAGATGCTACATTATAGCATTACCTTCGAGTAGAGTCGACTTGACATGTTTACATAGTTGCA 3'  
 TTAGCAATCTCCTAGTTAGAATTG\_1  
 CTAGTTAGAATTGTTGTGTCGGAA\_18  
 TAGTTAGAATTGTTGTGTCGGAA\_2  
 TACATTATAGCATTACCTTCGAGT\_1  
 TATAGCATTACCTTCGAGTAGAGT\_2  
 ACTTGACATGTTTACATAGTTGCA\_1

TAS3a\_508\_+\_477 Ppls68\_202V6.3 5.5 917-938 outer plastid envelope protein 16-1  
 query 3' CGUG-AGUAGUGGGAUACCU 5'  
 .:. .:. .:. .:. .:. .:. .:. .:  
 target 5' ACGCTTCATTACACGGTGTGGAAATCGTCTTCGGCTTGAGCCATTACTTTATTACAATGTGGCTAAATGCTGTAACAAGTATGTGTAACCTCTTACGTGGCTGTTGAAAGTTTATTTC 3'  
 ACGGTGTGGAAATCGTCTTCGGCT\_54  
 GTGTGGAAATCGTCTTCGGCTTGA\_9  
 TTGAGCCATTACTTTATTACAATG\_10  
 CTAATGCTGTAACAAGTATGT\_3  
 ACAAGTATGTGTAACCTCTTACG\_8  
 AGTATGTGTAACCTCTTACGTGG\_1  
 GTATGTGTAACCTCTTACGTGGC\_10  
 AACCTCTTACGTGGCTGTTGAAAG\_4



TAS3a\_536+\_115 Ppls3\_368V6.1 5.5 429-448 Histone superfamily protein  
query 3' GUUCCGUCAUCUUCUGUG 5'

..... : : : : :  
target 5' GGAGGCAGCAGAGGCCTACCTGGTTGGTTTGGTTTGGAGGATACCAACTTGTGTGCCATCCATGCAAAGCGGGTGACAATTATGCCCAAAGACATCCAAGTGGCCAGGAGAATCAGGGGAGA 3'  
GAGGCAGCAGAGGCCTACCTGGTT\_3  
AGGCAGCAGAGGCCTACCTGGTTG\_5  
GGCAGCAGAGGCCTACCTGGTTGG\_3  
GCAGAGGCCTACCTGGTTGGTTTG\_1  
AGGCCTACCTGGTTGGTTTGGTTG\_463  
TACCTGGTTGGTTTGGTTTGGAGGAT\_2  
TGTTTGGTTTGGAGGATACCAACTT\_5  
GTTTGGTTTGGAGGATACCAACTTGT\_5  
TTTGGTTTGGAGGATACCAACTTGTG\_20  
TTGGTTTGGAGGATACCAACTTGTGT\_8  
TGTTTGGAGGATACCAACTTGTGTG\_9  
TTTGGAGGATACCAACTTGTGTGCC\_16  
TGAGGATACCAACTTGTGTGCCAT\_5  
GAGGATACCAACTTGTGTGCCATC\_2  
GGATACCAACTTGTGTGCCATCCA\_2  
CAACTTGTGTGCCATCCATGCAA\_2  
AACTTGTGTGCCATCCATGCAAAG\_8  
ACTTGTGTGCCATCCATGCAAAGC\_1  
TGTGTGCCATCCATGCAAAGCGGG\_17  
GTGTGCCATCCATGCAAAGCGGGT\_30  
TGTGCCATCCATGCAAAGCGGGTG\_21  
CATCCATGCAAAGCGGGTGACAAT\_6  
CCATGCAAAGCGGGTGACAATTAT\_1  
ATGCAAAGCGGGTGACAATTATGC\_35  
TGCAAAGCGGGTGACAATTATGCC\_3  
AAAGCGGGTGACAATTATGCCCAA\_5  
AGCGGGTGACAATTATGCCCAAAG\_4  
CGGGTGACAATTATGCCCAAAGAC\_1  
GGTGACAATTATGCCCAAAGACAT\_1  
GTGACAATTATGCCCAAAGACATC\_20  
TGACAATTATGCCCAAAGACATCC\_10  
GACAATTATGCCCAAAGACATCCA\_8  
ACAATTATGCCCAAAGACATCCAA\_5  
AATTATGCCCAAAGACATCCAACT\_9  
ATGCCCAAAGACATCCAAGTGGCC\_5  
ATCCAAGTGGCCAGGAGAATCAGG\_9  
CCAAGTGGCCAGGAGAATCAGGGG\_3  
CCAAGTGGCCAGGAGAATCAGGGGA\_3

TAS3c\_111+\_225 Ppls86\_156V6.2 5 1431-1450 glyceraldehyde-3-phosphate dehydrogenase B subunit  
query 3' GGUGGGAUGGAUUAGUAAGG 5'

..... :  
target 5' TCGTCCATCTAATCTATCCGCCACCTCGAAAATGGGAATTTTTTCTTACTTCAACTGCC 3'  
TAATCTATCCGCCACCTCGAAAAT\_78  
TCTATCCGCCACCTCGAAAATGGG\_56  
CGCCACCTCGAAAATGGGAATTTT\_1

TAS3d\_3\_-1127 Ppls47\_90V6.1 5 1123-1143 Homeodomain-like superfamily protein  
query 3' CCGCGAUAGGAGGACUCGAA 5'

:. . : .....  
target 5' GGTTTGAACCCTCCTGAGCTATCACACAAACATGGAACAGCCGACTCGCAAGGCGATATCCCACATGCTGCCACAATCTGCAGCAGCAGCAGTCGCGCGTACAGTCAGGCGCCGTGTCCC 3'  
TGAACCCTCCTGAGCTATCACACA\_1  
TCCTGAGCTATCACACAAACATGG\_33  
ACACAAACATGGAACAGCCGACTC\_1  
CTCGCAAGGCGATATCCCACATGC\_1
